# Supplementary material for: Transition-metal-free, one-pot synthesis of benzoxaboroles fromo-bromobenzaldehydesviavisible-light-promoted borylation
Source: Royal Society of Chemistry journal article supplement (doi:10.1039/d1ob01853a), 2021-01-01
Supplement: d1ob01853a1.pdf [file d1ob01853a1.pdf]

## Supplementary Information

### Transition-metal-free, one-pot synthesis of Benzoxaboroles from *o*-bromobenzaldehydes *via* visible-light-promoted borylation

#### Table of Contents:

|                                         |    |
|-----------------------------------------|----|
| General information.....                | 1  |
| Setup for photocatalytic reactions..... | 2  |
| Investigation of Mechanism.....         | 2  |
| Analytical data of the products.....    | 4  |
| References.....                         | 11 |
| Spectrum.....                           | 12 |

#### 1. General information

Column chromatography was generally performed on silica gel (200-300 mesh) using EtOAc-Petroleum 1:5 as the eluent and reactions were monitored by thin layer chromatography visualize the course of the reactions. Other chemicals were purchased from Beijing Ouhe chemical Co. Ltd and used received without further purification. Nuclear magnetic resonance (NMR) spectra are recorded in parts per million from internal tetramethylsilane on the  $\delta$  scale.  $^1\text{H}$  NMR and  $^{13}\text{C}$  NMR spectra were recorded in  $\text{CDCl}_3$  or  $d_6$ -DMSO on a Bruker DRX-400 spectrometer operating at 400 MHz and 151 MHz, respectively. All chemical shift values are quoted in ppm and coupling constants quoted in Hz. The solvent peak was used as a reference value, for  $^1\text{H}$  NMR: TMS = 0.00 ppm,  $\text{CDCl}_3$ = 7.26 ppm,  $d_6$ -DMSO= 2.50 ppm. for  $^{13}\text{C}$  NMR:  $\text{CDCl}_3$ = 77.00 ppm,  $d_6$ -DMSO= 39.95 ppm. The following abbreviations were used to explain multiplicities: s = singlet, d =doublet, dd = doublet of doublet, t = triplet, td = triplet of doublet, q = quartet, m = multiplet and br = broad.

## 2. Setup for photocatalytic reactions

The reaction setup is depicted in **Figure S1**. 3W LED blue lights are available for purchase. During the first experiment the temperature was monitored inside the Schlenk tube and did not exceed the room temperature.

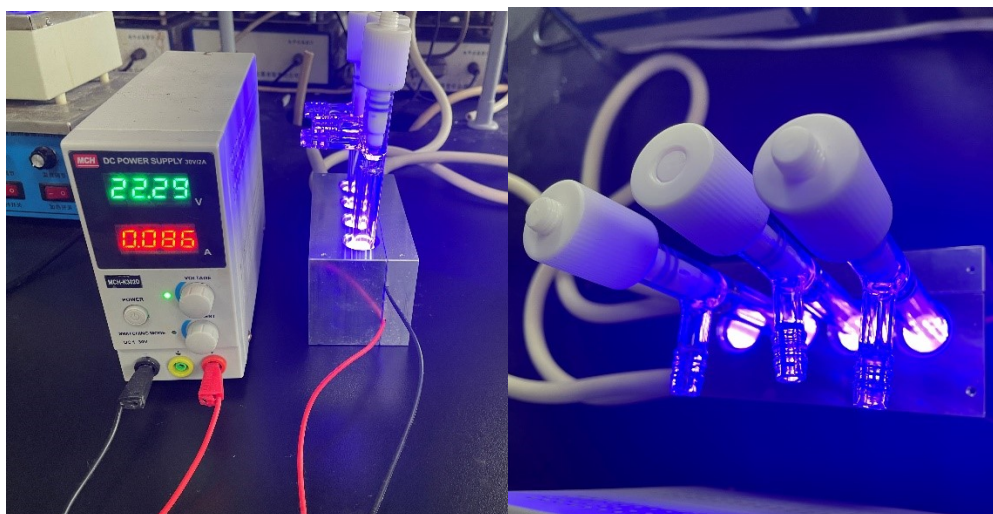

**Figure S1.** LED reaction setup

## 3. Investigation of Mechanism

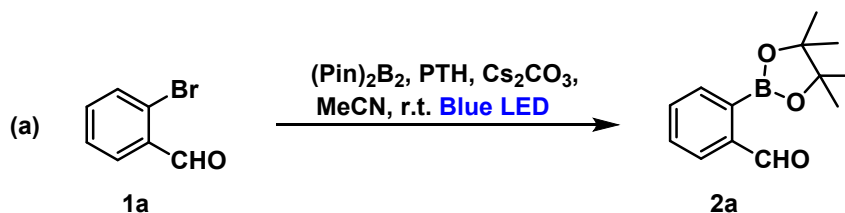

The mixture of 2-bromobenzaldehyde (1a, 0.25 mmol),  $(\text{Pin})_2\text{B}_2$  (1 mmol, 4 equiv.), PTH (10 mol %),  $\text{Cs}_2\text{CO}_3$  (0.5 mmol, 2 equiv.) in MeCN (3 mL) was stirred and irradiated with an 3W blue LED at room temperature for 16 h. After the reaction completed (monitored by TLC), Then water (2 mL) was added and the mixture was extracted with EtOAc. The organic layers were dried over anhydrous  $\text{Na}_2\text{SO}_4$  and concentrated under reduced pressure to obtain the intermediate products 2a.

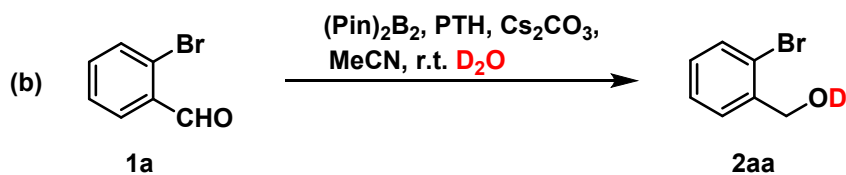

The mixture of 2-bromobenzaldehyde (1a, 0.25 mmol),  $(\text{Pin})_2\text{B}_2$  (1 mmol, 4 equiv.), PTH (10 mol %),  $\text{Cs}_2\text{CO}_3$  (0.5 mmol, 2 equiv.) in MeCN (2 mL) and  $\text{D}_2\text{O}$  was stirred and irradiated with an 3W blue LED at room temperature for 12 h. After the reaction completed (monitored by TLC), the mixture was extracted with EtOAc. The organic layers were dried over anhydrous  $\text{Na}_2\text{SO}_4$  and concentrated under reduced pressure to obtain the products 2aa.

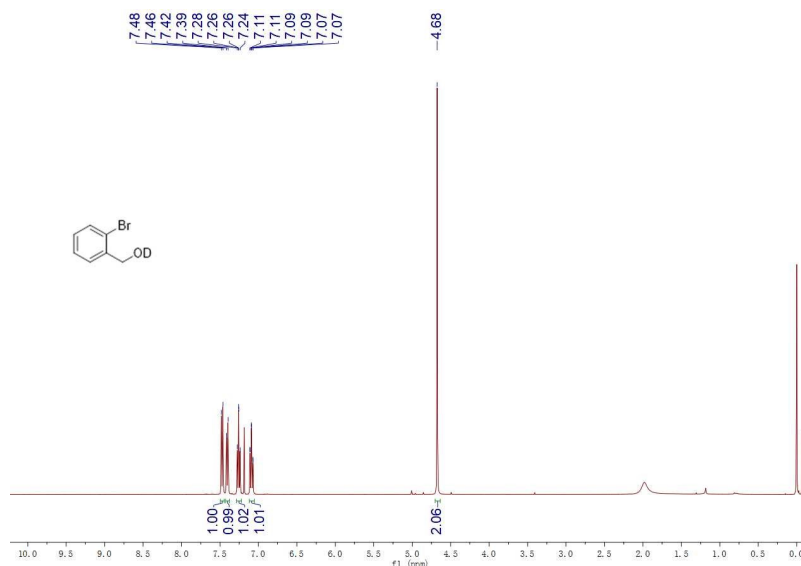

$^1\text{H-NMR}$  spectrum of 2aa

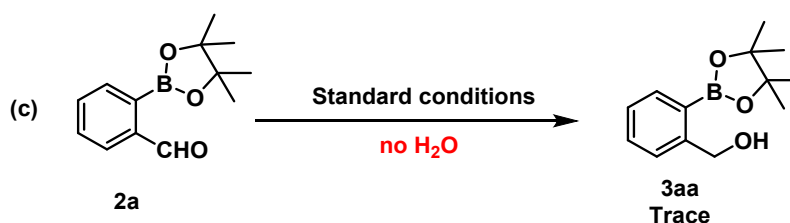

Through the control reaction (a), we obtained the intermediate products 2a with standard conditions. The mixture of 2-bromobenzaldehyde (1a, 0.25 mmol),  $(\text{Pin})_2\text{B}_2$  (1 mmol, 4 equiv.), PTH (10 mol %),  $\text{Cs}_2\text{CO}_3$  (0.5 mmol, 2 equiv.) in MeCN (3 mL) was stirred and irradiated with an 3W blue LED at room temperature for 16 h. After the reaction completed (monitored by TLC), only traces amount of 3aa can be detected without  $\text{H}_2\text{O}$ .

---

#### 4. Analytical data of the products

##### Benzo[c][1,2]oxaborol-1(3H)-ol (3a)<sup>1</sup>:

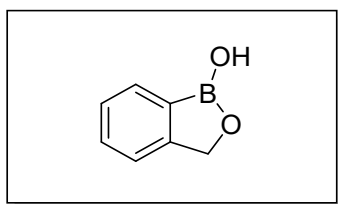

Yield: 55%. White solid. <sup>1</sup>H NMR (600 MHz, CDCl<sub>3</sub>) δ 7.83 (d, 1H, Ph-H), 7.53 (m, 1H, Ph-H), 7.42 – 7.38 (m, 2H, Ph-H), 5.18 (s, 2H, CH<sub>2</sub>). <sup>13</sup>C NMR (151 MHz, CDCl<sub>3</sub>) δ 153.44 (Ph), 153.42 (Ph), 131.12 (Ph), 130.67 (Ph), 127.27 (Ph), 121.11 (Ph), 71.31 (CH<sub>2</sub>).

##### 6-fluorobenzo[c][1,2]oxaborol-1(3H)-ol (3b)<sup>1</sup>:

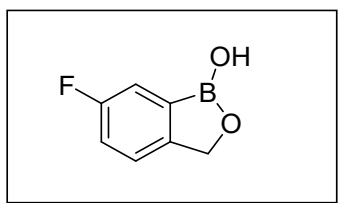

Yield: 53%. White solid. <sup>1</sup>H NMR (600 MHz, CDCl<sub>3</sub>) δ 7.46 - 7.44 (m, 1H, Ph-H), 7.10 (t, *J* = 8.2 Hz, 1H, Ph-H), 6.87 (d, *J* = 8.8 Hz, 1H, Ph-H), 4.28 (s, 2H, CH<sub>2</sub>). <sup>13</sup>C NMR (151 MHz, CDCl<sub>3</sub>) δ 161.72 (d, *J* = 248.4Hz, Ph), 140.87 (d, *J* = 7.6Hz, Ph), 134.48 (Ph), 131.69 (d, *J* = 8.3Hz, Ph), 116.32 (d, *J* = 21.5Hz, Ph), 115.34 (d, *J* = 20.9Hz, Ph), 61.70 (CH<sub>2</sub>).

##### 5-fluorobenzo[c][1,2]oxaborol-1(3H)-ol (3c)<sup>1</sup>:

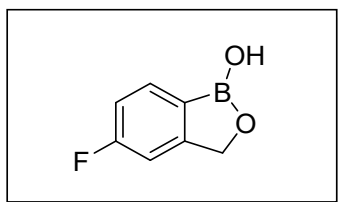

Yield: 55%. White solid. <sup>1</sup>H NMR (600 MHz, CDCl<sub>3</sub>) δ 7.82 – 7.77 (m, 1H, Ph-H), 7.39 (m, 1H, Ph-H), 7.10 – 7.05 (m, 1H, Ph-H), 5.15 (d, 2H, CH<sub>2</sub>). <sup>13</sup>C NMR (151 MHz, CDCl<sub>3</sub>) δ 154.77 (d, *J* = 396.8Hz, Ph), 130.88 (d, *J* = 75.1Hz, Ph), 127.27 (Ph), 121.11 (Ph), 115.23 (d, *J* = 22.1Hz, Ph), 108.33 (d, *J* = 22.3Hz, Ph), 71.04 (d, *J* = 81.6Hz, CH<sub>2</sub>).

---

**6-methylbenzo[c][1,2]oxaborol-1(3H)-ol (3d)<sup>2</sup>:**

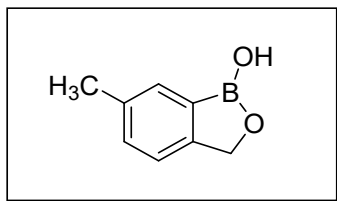

Yield: 68%. White solid. <sup>1</sup>H NMR (300 MHz, DMSO-*d*<sub>6</sub>) δ 7.42 (d, *J* = 7.8 Hz, 1H, Ph-H), 7.16 (d, *J* = 7.7 Hz, 1H, Ph-H), 6.84 (s, 1H, Ph-H), 4.15 – 4.05 (m, 2H, CH<sub>2</sub>), 2.29 (s, 3H, CH<sub>3</sub>). <sup>13</sup>C NMR (151 MHz, CDCl<sub>3</sub>) δ 142.57 (Ph), 138.70 (Ph), 129.61 (Ph), 119.12 (Ph), 113.28 (Ph), 112.25 (Ph), 55.24 (CH<sub>2</sub>), 24.84 (CH<sub>3</sub>).

**Benzo[c][1,2]oxaborole-1,7(3H)-diol (3e)<sup>2</sup>:**

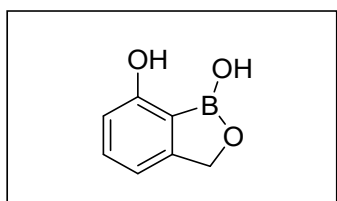

Yield: 56%. White solid. <sup>1</sup>H NMR (600 MHz, CDCl<sub>3</sub>) δ 7.23 (d, *J* = 7.8 Hz, 1H, Ph-H), 6.90 (d, *J* = 8.8 Hz, 2H, Ph-H), 6.80 – 6.78 (m, 1H, Ph-H), 4.66 (s, 2H, CH<sub>2</sub>). <sup>13</sup>C NMR (151 MHz, CDCl<sub>3</sub>) δ 156.12 (Ph), 142.48 (Ph), 129.83 (Ph), 119.02 (Ph), 114.74 (Ph), 113.87 (Ph), 65.07 (CH<sub>2</sub>).

**5-methoxybenzo[c][1,2]oxaborol-1(3H)-ol (3f)<sup>1</sup>:**

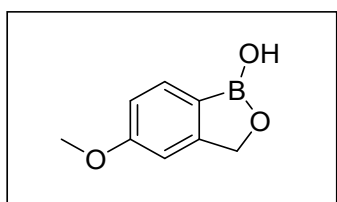

Yield: 63%. White solid. <sup>1</sup>H NMR (600 MHz, CDCl<sub>3</sub>) δ 7.06 (m, 2H, Ph-H), 6.88 (m, 1H, Ph-H), 4.36 – 4.29 (m, 2H, CH<sub>2</sub>), 3.86 (s, 3H, OCH<sub>3</sub>). <sup>13</sup>C NMR (151 MHz, CDCl<sub>3</sub>) δ 159.16 (Ph), 140.46 (Ph), 131.82 (Ph), 131.20 (Ph), 114.19 (Ph), 113.28 (Ph), 62.97 (CH<sub>2</sub>), 55.33 (CH<sub>3</sub>).

**Methyl 4-((1-hydroxy-1,3-dihydrobenzo[c][1,2]oxaborol-6-yl)oxy)benzoate (3g)<sup>3</sup>:**

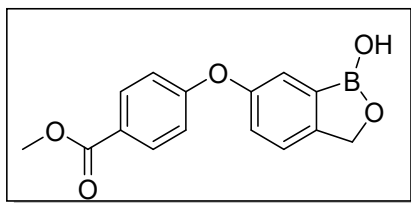

Yield: 54%. White solid.  $^1\text{H}$  NMR (300 MHz,  $\text{DMSO-}d_6$ )  $\delta$  9.30 (s, 1H, OH), 7.97 (d,  $J = 8.7$  Hz, 2H, Ph-H), 7.55 - 7.42 (m, 2H, Ph-H), 7.27 (dd,  $J = 8.2, 2.2$  Hz, 1H, Ph-H), 7.05 (d,  $J = 8.7$  Hz, 2H, Ph-H), 5.01 (s, 2H,  $\text{CH}_2$ ), 3.83 (s, 3H,  $\text{CH}_3$ ).  $^{13}\text{C}$  NMR (151 MHz,  $\text{DMSO-}d_6$ )  $\delta$  166.13 (Ph), 162.22 (Ph), 154.54 (Ph), 150.57 (Ph), 132.02 (Ph), 124.29 (Ph), 123.85 (Ph), 123.56 (Ph), 121.99 (Ph), 117.58 (Ph), 70.19 ( $\text{CH}_2$ ), 52.46 ( $\text{CH}_3$ ).

**4-((1-hydroxy-1,3-dihydrobenzo[c][1,2]oxaborol-6-yl)oxy)benzoic acid (3h)<sup>3</sup>:**

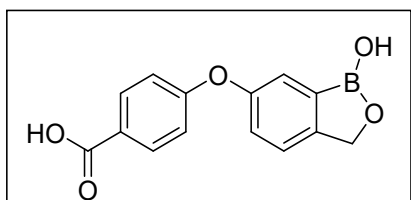

Yield: 54%. White solid.  $^1\text{H}$  NMR (300 MHz,  $\text{DMSO-}d_6$ )  $\delta$  7.95 (dd,  $J = 5.4, 3.2$  Hz, 2H, Ph-H), 7.50 (d,  $J = 8.2$  Hz, 1H, Ph-H), 7.42 (s, 1H, Ph-H), 7.27 (d,  $J = 8.2$  Hz, 1H, Ph-H), 7.04 (d,  $J = 8.7$  Hz, 2H, Ph-H), 5.01 (s, 2H,  $\text{CH}_2$ ).  $^{13}\text{C}$  NMR (151 MHz,  $\text{DMSO-}d_6$ )  $\delta$  167.21 (Ph), 161.80 (Ph), 154.89 (Ph), 150.37 (Ph), 132.14 (Ph), 125.63 (Ph), 123.84 (Ph), 123.45 (Ph), 121.44 (Ph), 117.66 (Ph), 70.21 ( $\text{CH}_2$ ).

**6-(4-nitrophenoxy)benzo[c][1,2]oxaborol-1(3H)-ol (3i)<sup>4</sup>:**

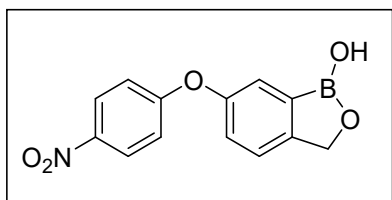

Yield: 17%. White solid.  $^1\text{H}$  NMR (300 MHz,  $\text{DMSO-}d_6$ )  $\delta$  9.30 (s, 1H, OH), 8.35 - 8.15 (m, 2H, Ph-H), 7.60 - 7.43 (m, 2H, Ph-H), 7.32 (dd,  $J = 8.2, 2.1$  Hz, 1H, Ph-H), 7.21 - 7.07 (m, 2H, Ph-H), 5.03 (s, 2H,  $\text{CH}_2$ ).  $^{13}\text{C}$  NMR (151 MHz,  $\text{DMSO-}d_6$ )  $\delta$  163.67 (Ph), 154.00 (Ph), 151.19 (Ph), 142.64 (Ph), 126.64 (Ph), 124.10 (Ph), 123.80 (Ph), 122.11 (Ph), 117.78 (Ph), 70.25 ( $\text{CH}_2$ ).

**6-(4-aminophenoxy)benzo[c][1,2]oxaborol-1(3H)-ol (3j)<sup>4</sup>:**

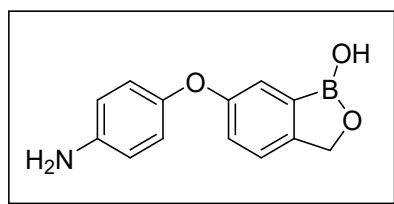

Yield: 37%. White solid. <sup>1</sup>H NMR (300 MHz, DMSO-*d*<sub>6</sub>) δ 9.12 – 9.10 (m, 1H, OH), 7.45 – 7.25 (m, 1H, Ph-H), 7.24 – 7.00 (m, 2H, Ph-H), 6.88 – 6.56 (m, 4H, Ph-H), 5.00 – 4.88 (m, 4H, NH<sub>2</sub>,CH<sub>2</sub>). <sup>13</sup>C NMR (151 MHz, DMSO-*d*<sub>6</sub>) δ 158.81 (Ph), 147.58 (Ph), 146.40 (Ph), 145.85 (Ph), 123.04 (Ph), 121.35 (Ph), 120.71 (Ph), 117.46 (Ph), 115.41 (Ph), 70.03 (CH<sub>2</sub>).

**3-(nitromethyl)benzo[c][1,2]oxaborol-1(3H)-ol (4a)<sup>5</sup>:**

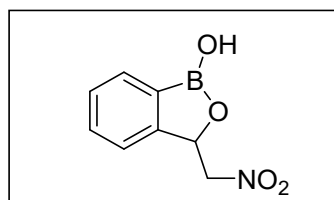

Yield: 48%. White solid. <sup>1</sup>H NMR (300 MHz, DMSO-*d*<sub>6</sub>) δ 8.94 (s, 1H, OH), 7.03-7.01 (m, 2H, Ph-H), 6.96-6.92 (m, H, Ph-H), 6.85-6.77 (m, 1H, Ph-H), 5.34-5.28 (m, 1H, CH), 4.87 (m, 2H, CH<sub>2</sub>). <sup>13</sup>C NMR (151 MHz, CDCl<sub>3</sub>) δ 142.02 (Ph), 139.79 (Ph), 130.69 (Ph), 130.05 (Ph), 128.99 (Ph), 128.00 (Ph), 68.93 (CH), 63.97 (CH<sub>2</sub>).

**4-chloro-3-(nitromethyl)benzo[c][1,2]oxaborol-1(3H)-ol (4b):**

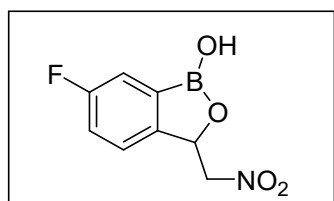

Yield: 42%. White solid. <sup>1</sup>H NMR (300 MHz, DMSO-*d*<sub>6</sub>) δ 7.21-7.16 (m, 1H, Ph-H), 7.03-7.00 (m, 1H, Ph-H), 6.95-6.93 (m, 1H, Ph-H), 5.95-5.55 (m, 1H, CH), 4.79-4.74 (m, 1H, CH<sub>2</sub>), 4.42-4.32 (m, 1H, CH<sub>2</sub>). <sup>13</sup>C NMR (151 MHz, CDCl<sub>3</sub>) δ 162.65 (Ph), 141.48 (Ph), 134.61 (Ph), 126.83 (Ph), 116.62 (Ph), 115.66 (Ph), 70.78 (CH), 67.92 (CH<sub>2</sub>). HRMS (ESI) *m/z* calcd for C<sub>8</sub>H<sub>7</sub>BFNO<sub>4</sub> [M+H]<sup>+</sup>: 212.0452, found 212.0455.

**5-fluoro-3-(nitromethyl)benzo[c][1,2]oxaborol-1(3H)-ol (4c):**

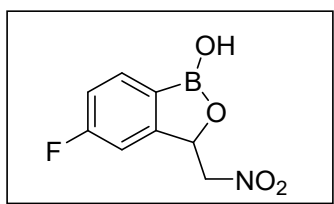

Yield: 46%. White solid.  $^1\text{H}$  NMR (300 MHz,  $\text{DMSO-}d_6$ )  $\delta$  7.51-7.49 (m, 2H, Ph-H), 7.46-7.34 (m, 1H, Ph-H), 5.26-5.23 (m, 1H, CH), 4.78-4.76 (m, 1H,  $\text{CH}_2$ ), 4.66-4.64 (m, 1H,  $\text{CH}_2$ ).  $^{13}\text{C}$  NMR (151 MHz,  $\text{DMSO-}d_6$ )  $\delta$  162.45 (d,  $J = 250.2\text{Hz}$ , Ph), 141.04 (d,  $J = 9.0\text{Hz}$ , Ph), 131.59 (Ph), 130.63 (Ph), 115.52 (d,  $J = 8.3\text{Hz}$ , Ph), 112.51 (d,  $J = 8.3\text{Hz}$ , Ph), 70.53 (CH), 66.79 (d,  $J = 80.3\text{Hz}$ ,  $\text{CH}_2$ ). HRMS (ESI)  $m/z$  calcd for  $\text{C}_8\text{H}_7\text{BFNO}_4$   $[\text{M}+\text{H}]^+$ : 212.0452, found 212.0457.

**6-methyl-3-(nitromethyl)benzo[c][1,2]oxaborol-1(3H)-ol (4d):**

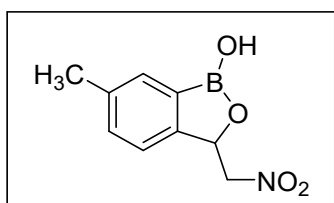

Yield: 49%. White solid.  $^1\text{H}$  NMR (300 MHz,  $\text{DMSO-}d_6$ )  $\delta$  7.21-7.16 (m, 1H, Ph-H), 7.02 (m, 1H, Ph-H), 6.94 (m, 1H, Ph-H), 5.59-5.55 (m, 1H, CH), 4.79-4.74 (m, 1H,  $\text{CH}_2$ ), 4.42-4.32 (m, 1H,  $\text{CH}_2$ ), 1.77 (s, 3H, Ph- $\text{CH}_3$ ).  $^{13}\text{C}$  NMR (151 MHz,  $\text{CDCl}_3$ )  $\delta$  159.87 (Ph), 158.46 (Ph), 132.46 (Ph), 131.03 (Ph), 117.80 (Ph), 114.95 (Ph), 75.11 (CH), 55.56 ( $\text{CH}_2$ ), 24.82 ( $\text{CH}_3$ ). HRMS (ESI)  $m/z$  calcd for  $\text{C}_9\text{H}_{10}\text{BNO}_4$   $[\text{M}+\text{H}]^+$ : 208.0703, found 208.0700.

**3-(nitromethyl)benzo[c][1,2]oxaborole-1,7(3H)-diol (4e):**

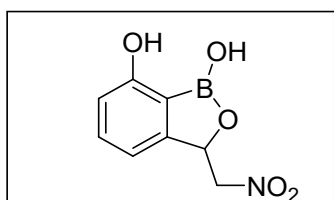

Yield: 48%. White solid.  $^1\text{H}$  NMR (600 MHz,  $\text{CDCl}_3$ )  $\delta$  9.98 (s, 1H, OH), 7.47 (s, 1H, Ph-H), 7.37 (s, 1H, Ph-H), 7.15 (s, 1H, Ph-H), 5.09 (m, 1H, CH), 4.68 (m, 1H,  $\text{CH}_2$ ), 4.34 (m, 1H,  $\text{CH}_2$ ).  $^{13}\text{C}$  NMR (151 MHz,  $\text{CDCl}_3$ )  $\delta$  156.37 (Ph), 137.91 (Ph), 130.38



---

(Ph), 123.37 (Ph), 121.93 (Ph), 114.75 (Ph), 70.18 (CH), 58.06 (CH<sub>2</sub>). HRMS (ESI)  $m/z$  calcd for C<sub>8</sub>H<sub>8</sub>BNO<sub>5</sub> [M+H]<sup>+</sup>: 210.0496, found 210.0498.

**5-methoxy-3-(nitromethyl)benzo[c][1,2]oxaborol-1(3H)-ol (4f):**

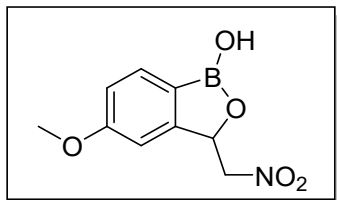

Yield: 43%. White solid. <sup>1</sup>H NMR (300 MHz, DMSO-*d*<sub>6</sub>) δ 8.87 – 8.83 (m, 1H, Ph-H), 8.28-8.23 (d, *J* = 7.5 Hz, 1H, Ph-H), 7.77-7.74 (d, *J* = 7.9 Hz, 1H, Ph-H), 5.72 (m, 1H, CH), 5.13 (m, 1H, CH<sub>2</sub>), 4.79 – 4.71 (m, 1H, CH<sub>2</sub>), 1.77 (s, 3H, CH<sub>3</sub>). <sup>13</sup>C NMR (151 MHz, CDCl<sub>3</sub>) δ 157.78 (Ph), 137.55 (Ph), 131.69 (Ph), 130.40 (Ph), 117.13 (Ph), 114.28 (Ph), 70.04 (CH), 67.10 (CH<sub>2</sub>), 54.85 (OCH<sub>3</sub>). HRMS (ESI)  $m/z$  calcd for C<sub>9</sub>H<sub>10</sub>BNO<sub>5</sub> [M+H]<sup>+</sup>: 224.0653, found 224.0657.

**Methyl-4-((1-hydroxy-3-(nitromethyl)-1,3-dihydrobenzo[c][1,2]oxaborol-6-yl)oxy)benzoate (4g):**

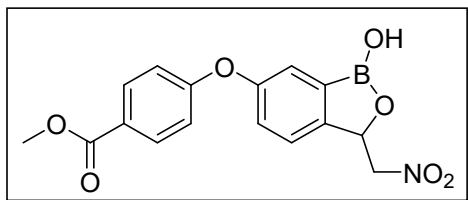

Yield: 40%. White solid. <sup>1</sup>H NMR (300 MHz, DMSO-*d*<sub>6</sub>) δ 7.96 -7.91 (m, 3H, Ph-H), 7.17 - 7.08 (m, 2H, Ph-H), 7.03 - 6.94 (m, 2H, Ph-H), 5.24 - 5.21 (m, 1H, CH), 4.81-4.75 (m, 1H, CH<sub>2</sub>), 4.27 – 4.19 (m, 1H, CH<sub>2</sub>), 3.82 (s, 3H, CH<sub>3</sub>). <sup>13</sup>C NMR (151 MHz, DMSO-*d*<sub>6</sub>) δ 163.68 (Ph), 161.25 (Ph), 161.03 (Ph), 136.97 (Ph), 134.46 (Ph), 132.60 (Ph), 129.72 (Ph), 128.09 (Ph), 127.19 (Ph), 115.41 (Ph), 114.91 (Ph), 70.46 (CH), 66.86 (CH<sub>2</sub>), 57.60 (CH<sub>3</sub>). HRMS (ESI)  $m/z$  calcd for C<sub>16</sub>H<sub>14</sub>BNO<sub>7</sub> [M+H]<sup>+</sup>: 344.0863, found 344.0860.

**4-((1-hydroxy-3-(nitromethyl)-1,3-dihydrobenzo[c][1,2]oxaborol-6-yl)oxy)benzoic acid (4h):**

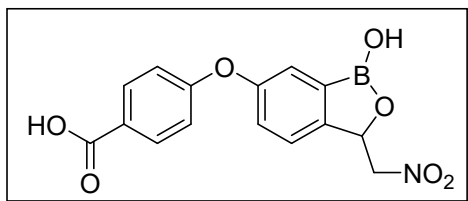

Yield: 43%. White solid.  $^1\text{H}$  NMR (300 MHz,  $\text{DMSO-}d_6$ )  $\delta$  12.83 (s, 1H, COOH), 9.52 (s, 1H, OH), 7.97 – 7.95 (m, 2H, Ph-H), 7.65 – 7.64 (m, 1H, Ph-H), 7.39 – 7.33 (m, 2H, Ph-H), 7.05 – 7.03 (m, 2H, Ph-H), 5.98 – 5.73 (m, 1H, CH), 5.50 – 5.35 (m, 1H, CH<sub>2</sub>), 4.74 – 4.61 (m, 1H, CH<sub>2</sub>).  $^{13}\text{C}$  NMR (151 MHz,  $\text{DMSO-}d_6$ )  $\delta$  164.19 (COOH), 161.71 (Ph), 151.86 (Ph), 148.79 (Ph), 135.46 (Ph), 130.51 (Ph), 128.17 (Ph), 126.34 (Ph), 125.89 (Ph), 118.46 (Ph), 115.62 (Ph), 75.75 (CH), 70.44 (CH<sub>2</sub>). HRMS (ESI)  $m/z$  calcd for  $\text{C}_{15}\text{H}_{12}\text{BNO}_7$   $[\text{M}+\text{H}]^+$ : 330.0707, found 330.0711.

**Diethyl 2-(1-hydroxy-1,3-dihydrobenzo[c][1,2]oxaborol-3-yl)malonate (4i)<sup>6</sup>:**

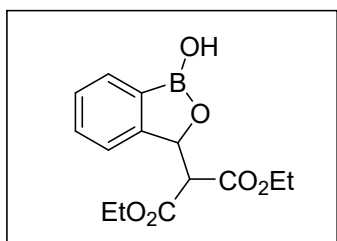

Yield: 26%. White solid.  $^1\text{H}$  NMR (600 MHz,  $\text{CDCl}_3$ )  $\delta$  10.57 (s, 1H, OH), 7.68 – 7.52 (m, 2H, Ph-H), 7.45-7.40 (m, 2H, Ph-H), 4.99 (s, 1H, CH), 4.37 (m, 2H, CH<sub>2</sub>), 4.24 (m, 2H, CH<sub>2</sub>), 3.39 (s, 1H, CH), 1.42 (m, 6H, CH<sub>3</sub>).  $^{13}\text{C}$  NMR (151 MHz,  $\text{CDCl}_3$ )  $\delta$  170.35 (CO), 169.49 (CO), 135.48 (Ph), 133.01 (Ph), 130.75 (Ph), 128.19 (Ph), 127.92 (Ph), 125.00 (Ph), 72.25 (CH), 62.49 (CH<sub>2</sub>), 61.32 (CH<sub>2</sub>), 41.20 (CH), 14.05 (CH<sub>3</sub>).

**Ethyl-2-cyano-2-(1-hydroxy-1,3-dihydrobenzo[c][1,2]oxaborol-3-yl)acetate (4j)<sup>6</sup>:**

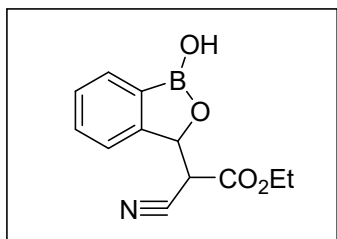

---

Yield: 31%. White solid.  $^1\text{H}$  NMR (300 MHz,  $\text{DMSO-}d_6$ )  $\delta$  7.78 (m, 1H, Ph-H), 7.60 (m, 1H, Ph-H), 7.48 (m, 1H, Ph-H), 7.31 (m, 1H, Ph-H), 5.13 (s, 1H, CH), 4.04 (m, 1H,  $\text{CH}_2$ ), 3.17 (m, 1H, CH), 1.07 (m, 3H,  $\text{CH}_3$ ).  $^{13}\text{C}$  NMR (300 MHz,  $\text{DMSO-}d_6$ )  $\delta$  164.17 (CO), 141.190 (Ph), 135.62 (Ph), 131.43 (Ph), 128.89 (Ph), 128.26 (Ph), 124.30 (Ph), 117.19 (CN), 74.04 (CH), 65.77 ( $\text{CH}_2$ ), 45.29 (CH), 15.34 ( $\text{CH}_3$ ).

## 5. References

1. S. J. Baker, Y.-K. Zhang, T. Akama, A. Lau, H. Zhou, V. Hernandez, W. Mao, M. R. K. Alley, V. Sanders and J. J. Plattner, *J Med Chem*, 2006, **49**, 4447-4450.
2. J. F. Cairns and H. R. Snyder, *J Org Chem*, 1964, **29**, 2810-2812.
3. Y. K. Zhang, J. J. Plattner, E. E. Easom, R. T. Jacobs, D. Guo, V. Sanders, Y. R. Freund, B. Campo, P. J. Rosenthal, W. Bu, F. J. Gamo, L. M. Sanz, M. Ge, L. Li, J. Ding and Y. Yang, *J Med Chem*, 2015, **58**, 5344-5354.
4. T. Akama, C. Dong, C. Virtucio, D. Sullivan, Y. Zhou, Y. K. Zhang, F. Rock, Y. Freund, L. Liu, W. Bu, A. Wu, X. Q. Fan and K. Jarnagin, *J Pharmacol Exp Ther*, 2013, **347**, 615-625.
5. A. B. Shapiro, N. Gao, L. Hajec and D. C. McKinney, *Anal Biochem*, 2012, **431**, 48-53.
6. J. Sravan Kumar, M. A. Alam, S. Gurrupu, G. Nelson, M. Williams, M. A. Corsello, J. L. Johnson, S. C. Jonnalagadda and V. R. Mereddy, *J Heterocyclic Chem*, 2013, **50**, 814-820.

## 6. Spectrum

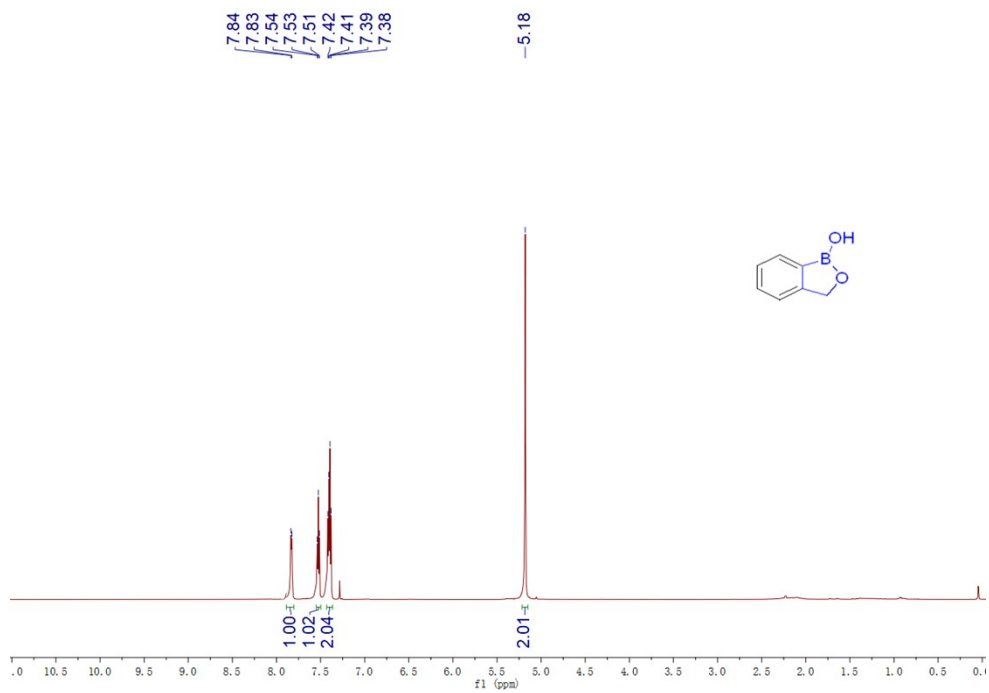

Figure S2. <sup>1</sup>H-NMR spectrum of 3a

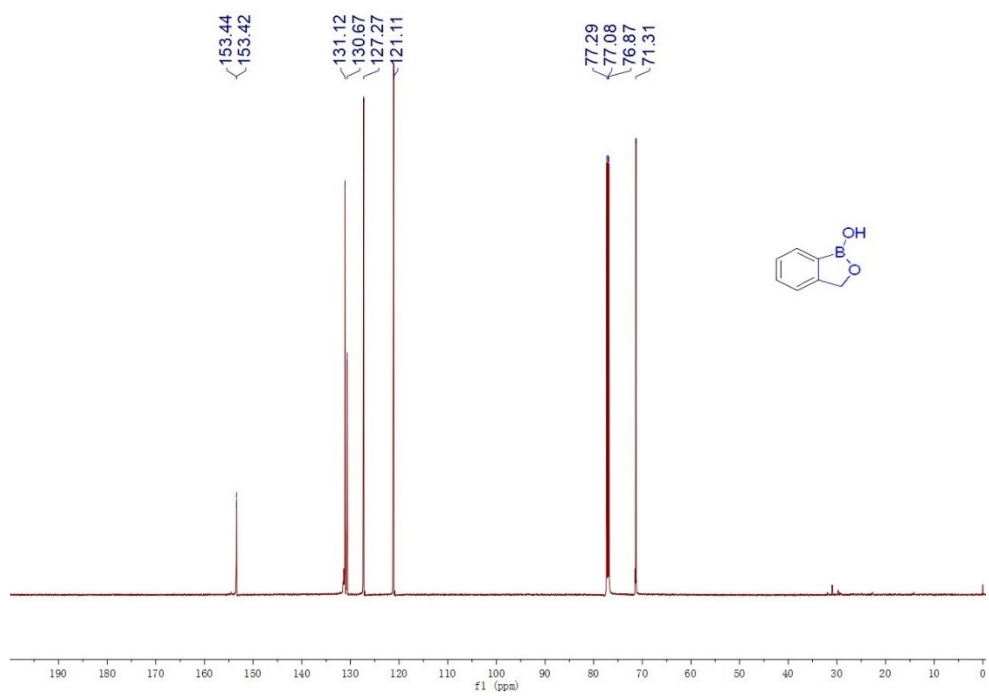

Figure S3. <sup>13</sup>C-NMR spectrum of 3a

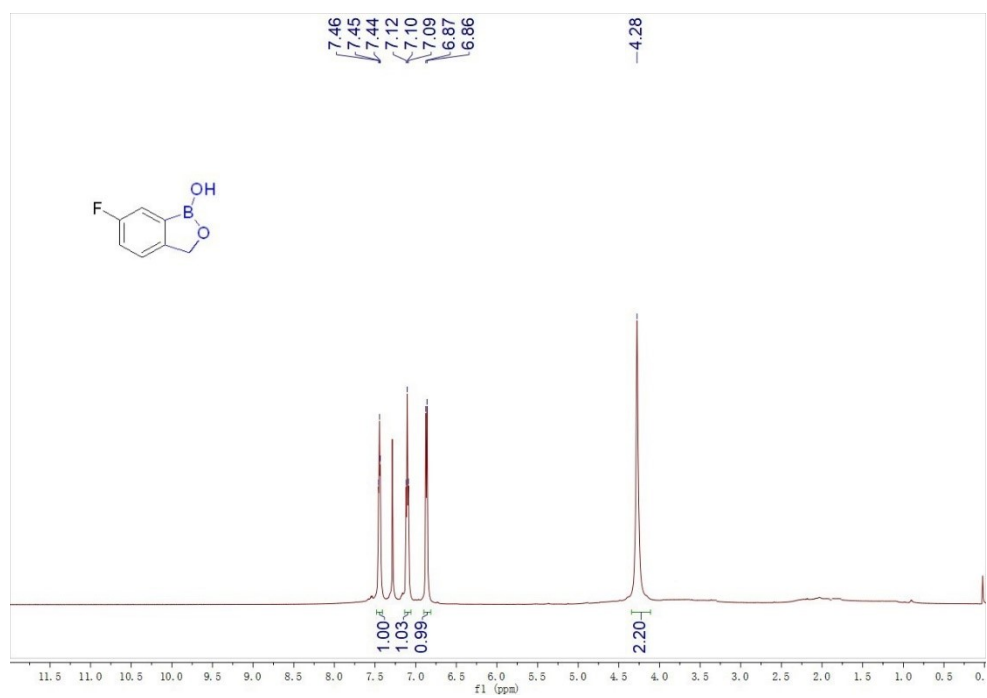

Figure S4.  $^1\text{H}$ -NMR spectrum of 3b

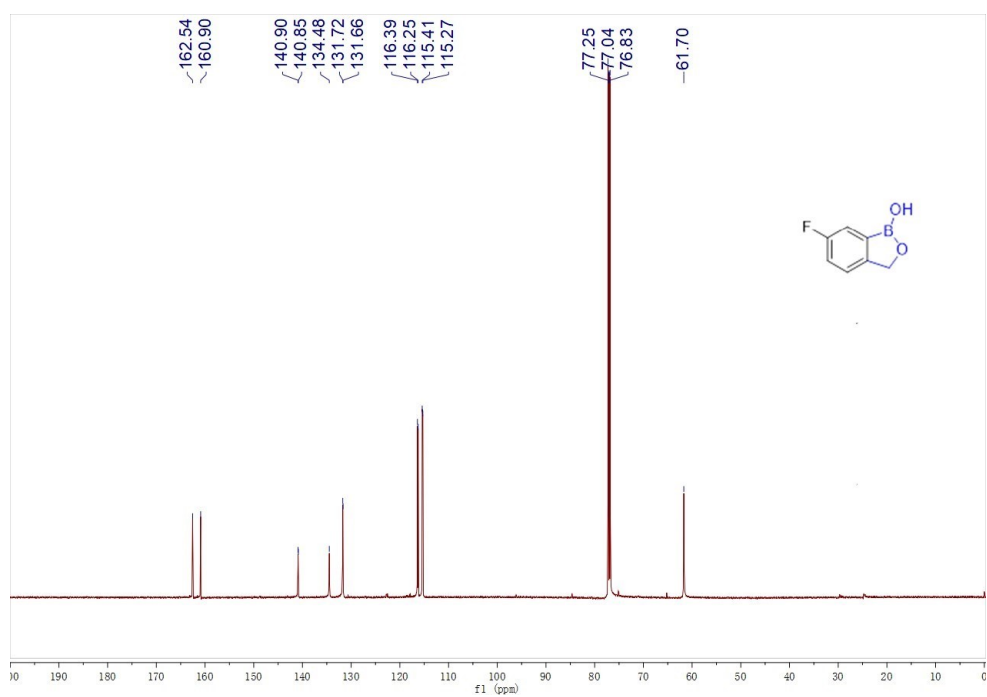

Figure S5.  $^{13}\text{C}$ -NMR spectrum of 3b

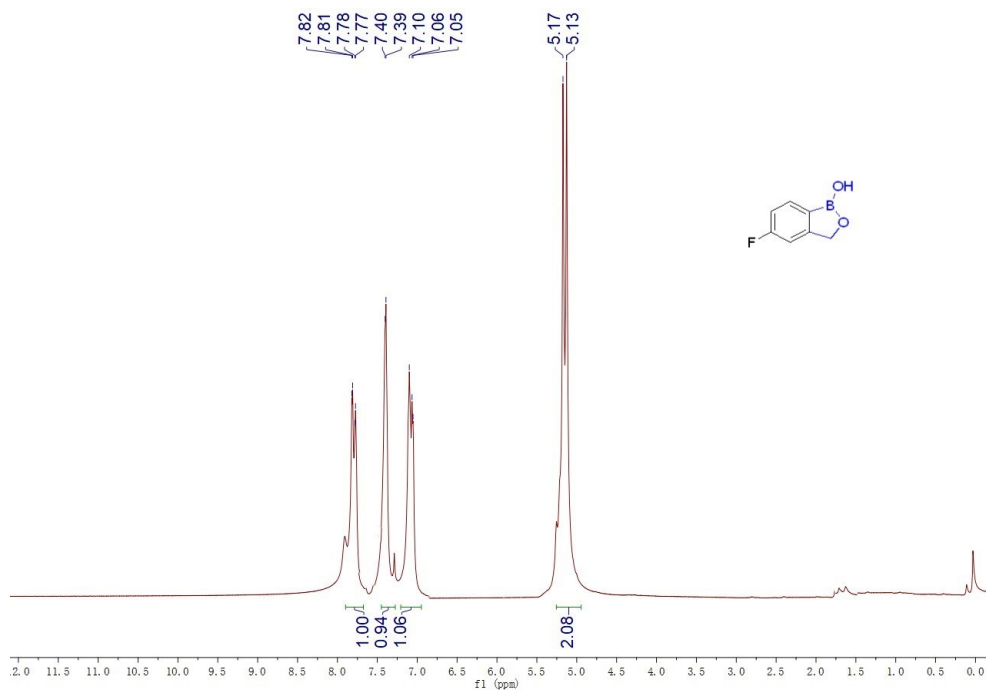

Figure S6.  $^1\text{H}$ -NMR spectrum of 3c

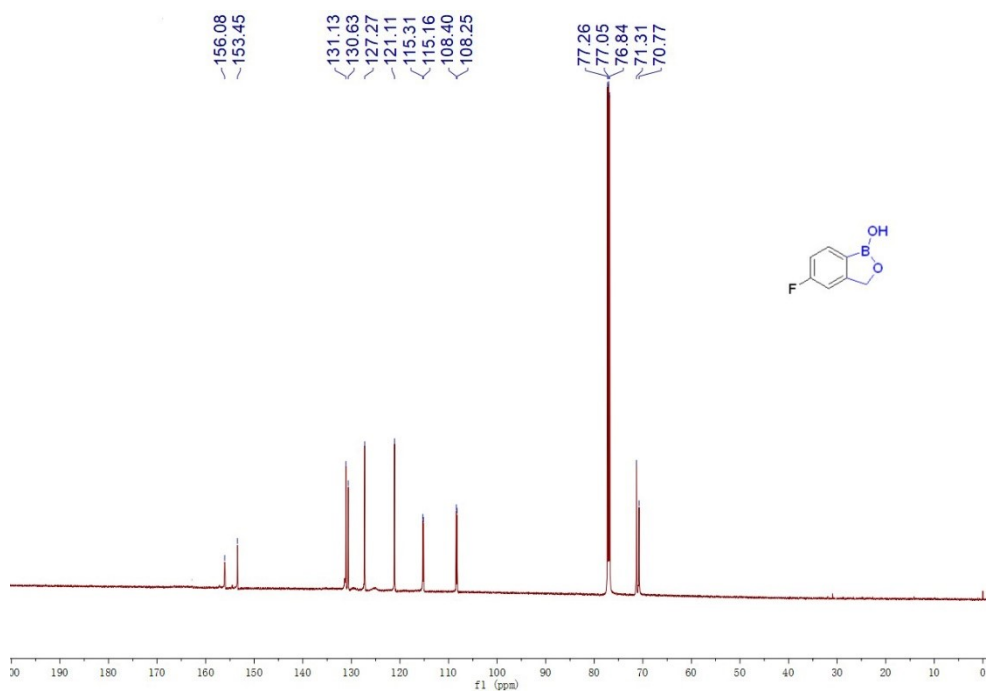

Figure S7.  $^{13}\text{C}$ -NMR spectrum of 3c

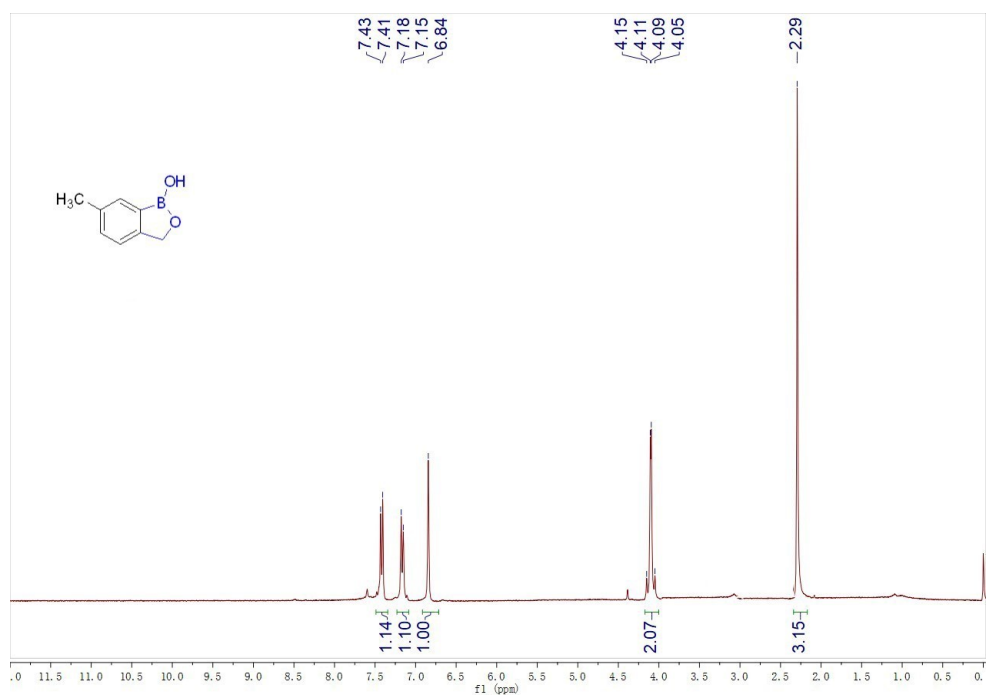

Figure S8. <sup>1</sup>H-NMR spectrum of 3d

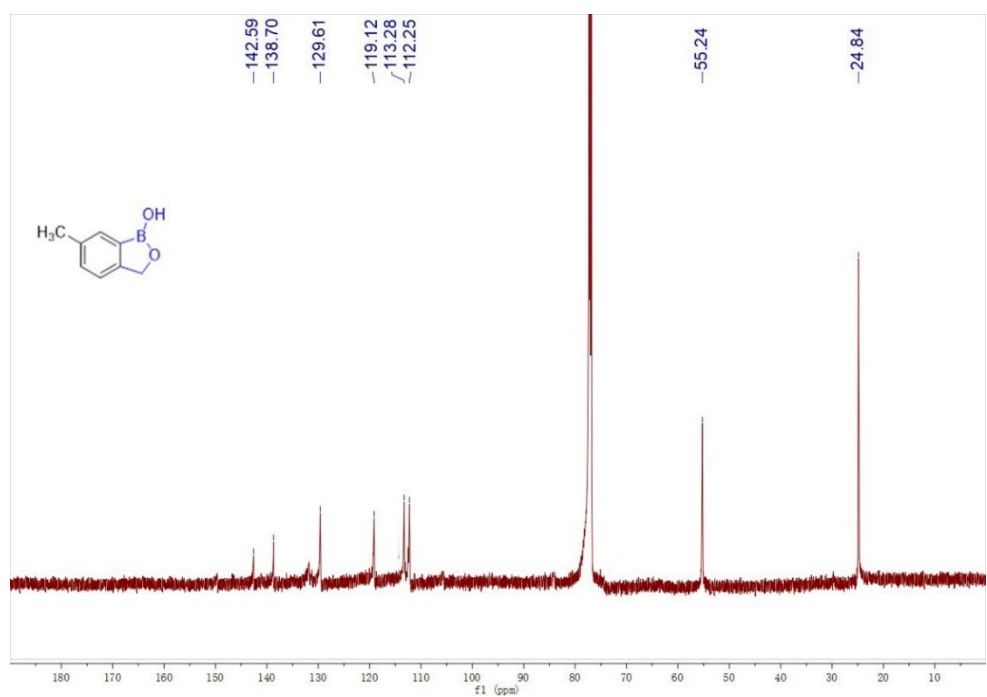

Figure S9. <sup>13</sup>C-NMR spectrum of 3d

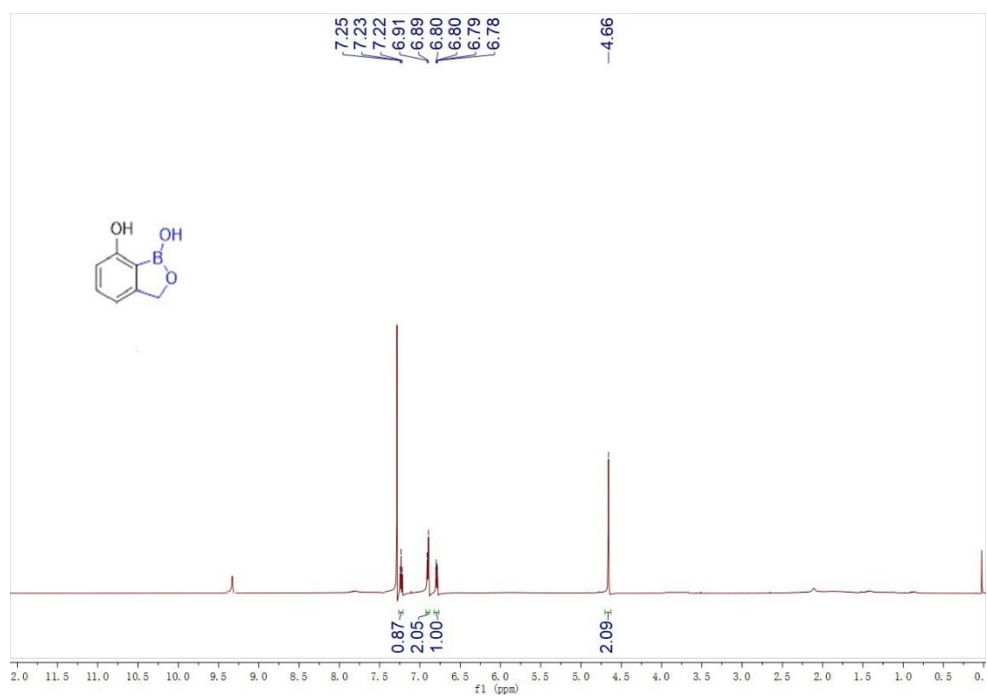

**Figure S10.**  $^1\text{H}$ -NMR spectrum of 3e

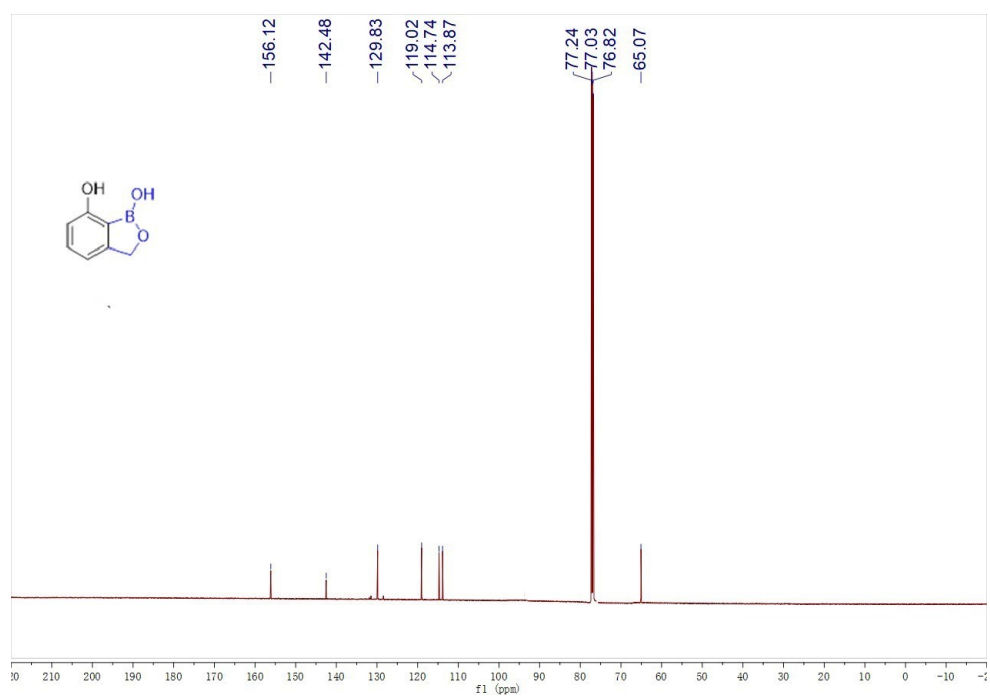

**Figure S11.**  $^{13}\text{C}$ -NMR spectrum of 3e



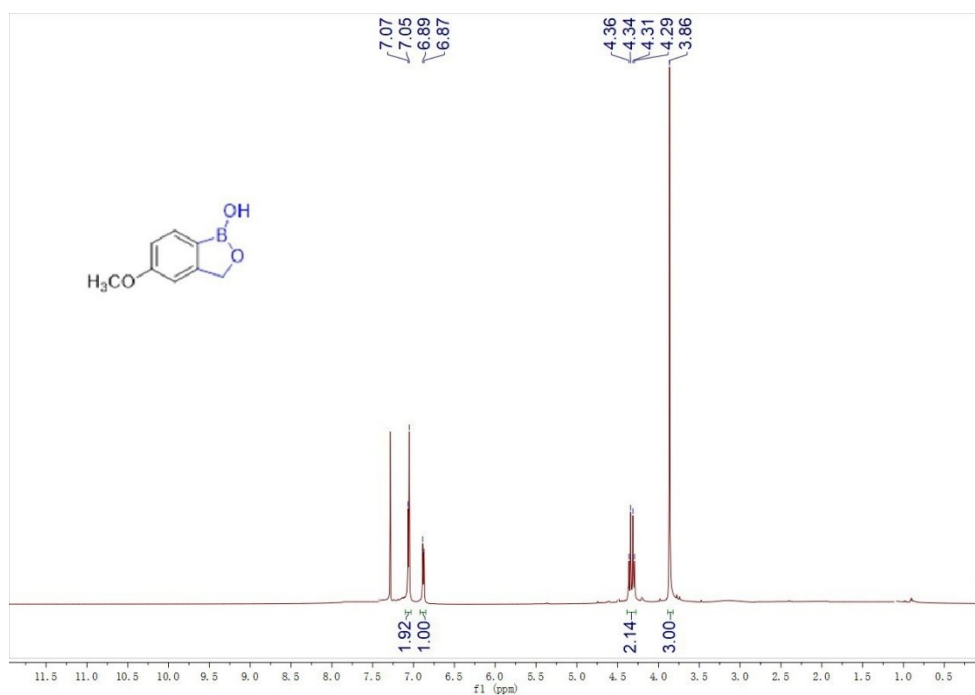

**Figure S12.**  $^1\text{H}$ -NMR spectrum of 3f

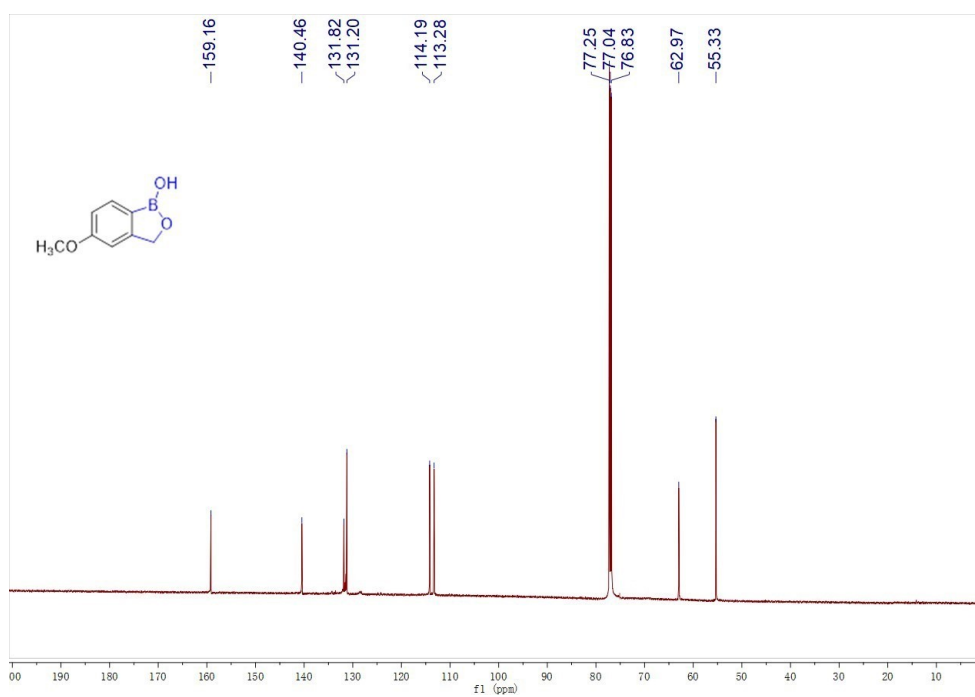

**Figure S13.**  $^{13}\text{C}$ -NMR spectrum of 3f

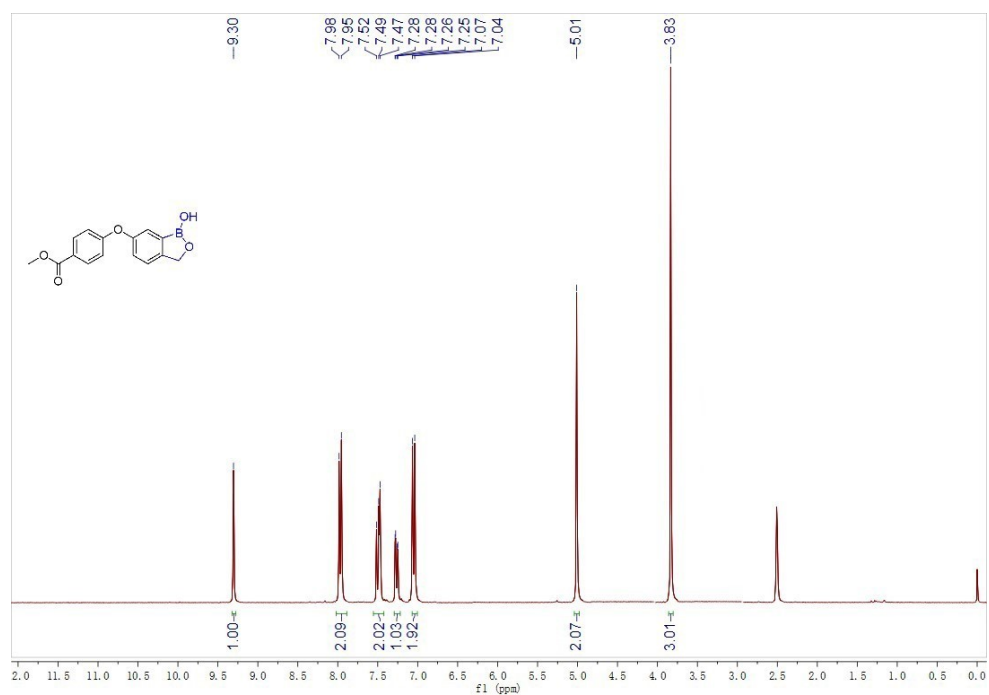

Figure S14. <sup>1</sup>H-NMR spectrum of 3g

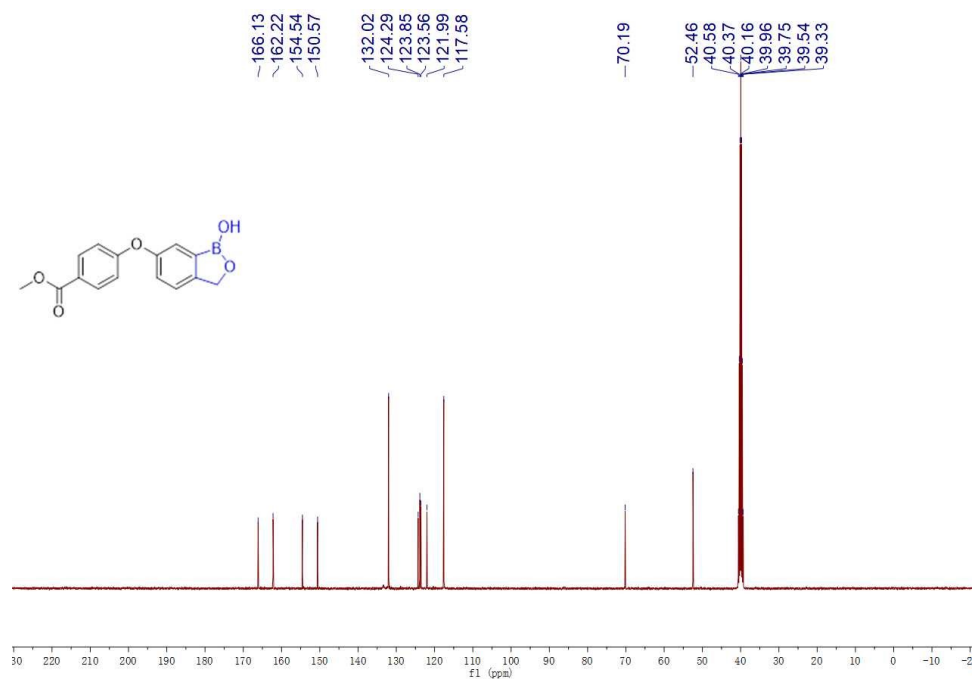

Figure S15. <sup>13</sup>C-NMR spectrum of 3g

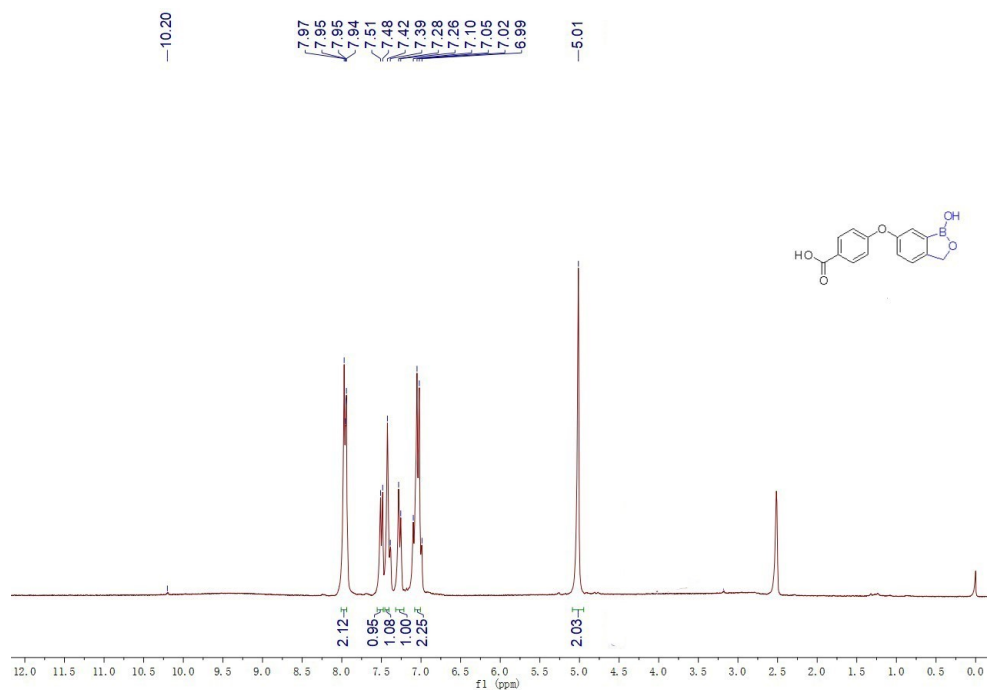

Figure S16.  $^1\text{H}$ -NMR spectrum of 3h

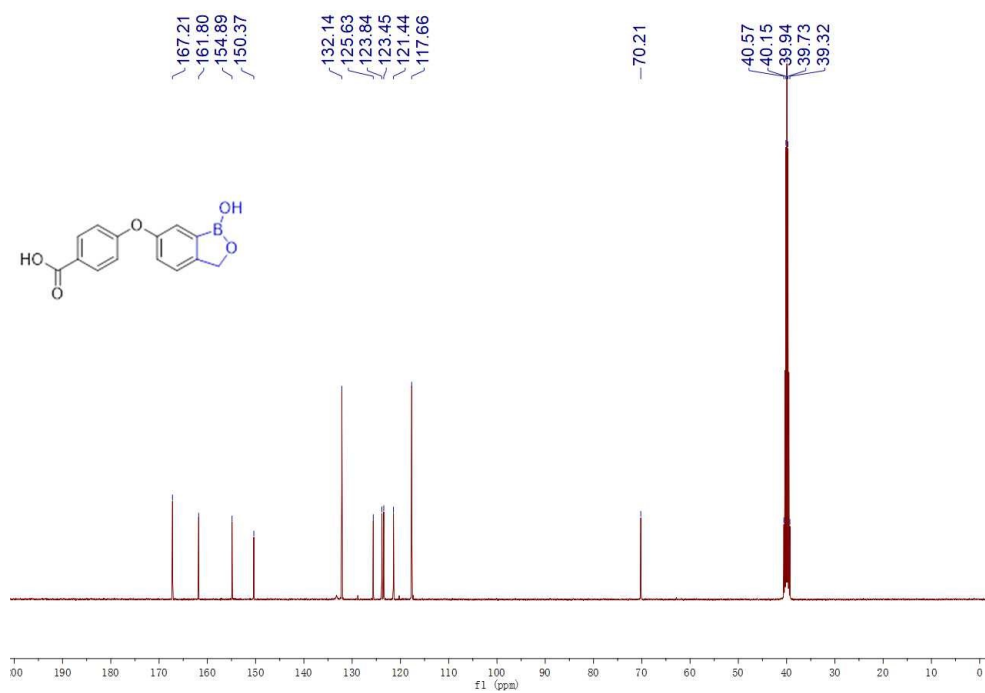

Figure S17.  $^{13}\text{C}$ -NMR spectrum of 3h

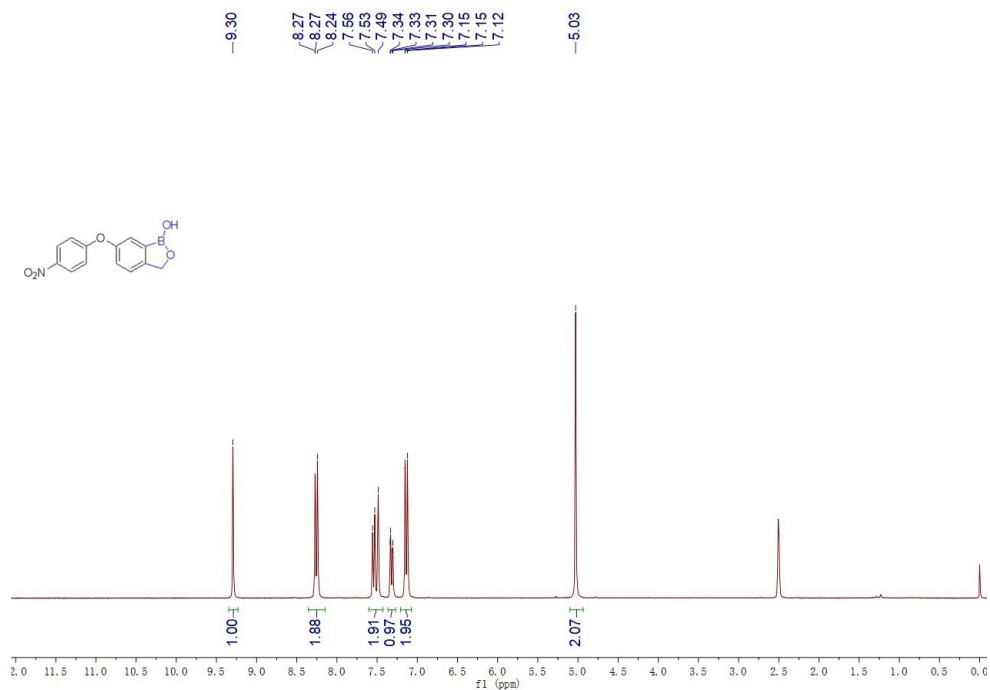

**Figure S18.** <sup>1</sup>H-NMR spectrum of 3i

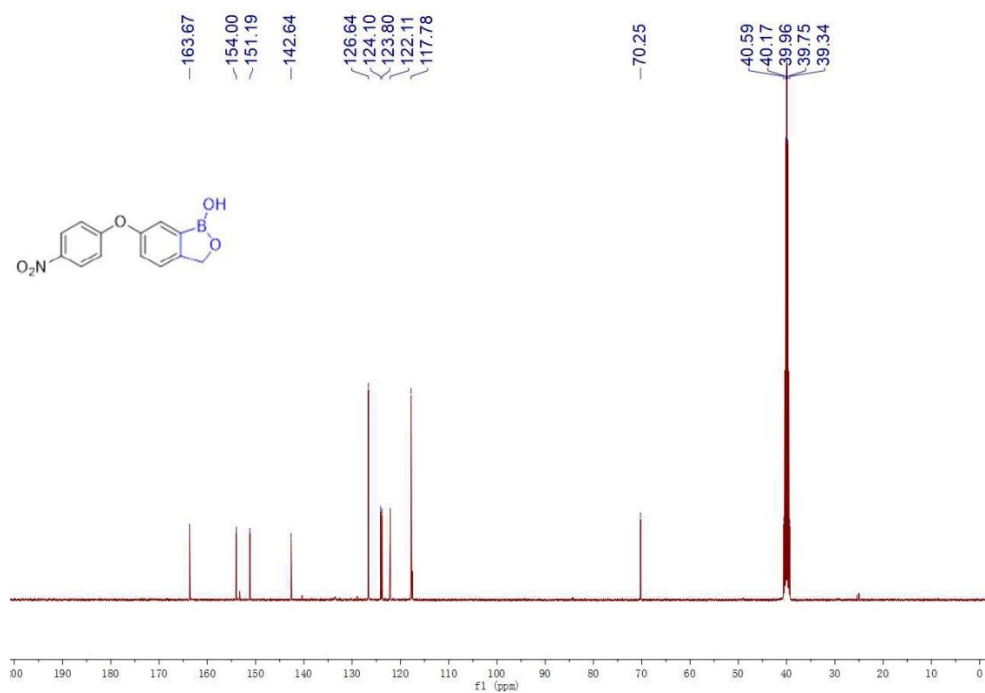

**Figure S19.** <sup>13</sup>C-NMR spectrum of 3i

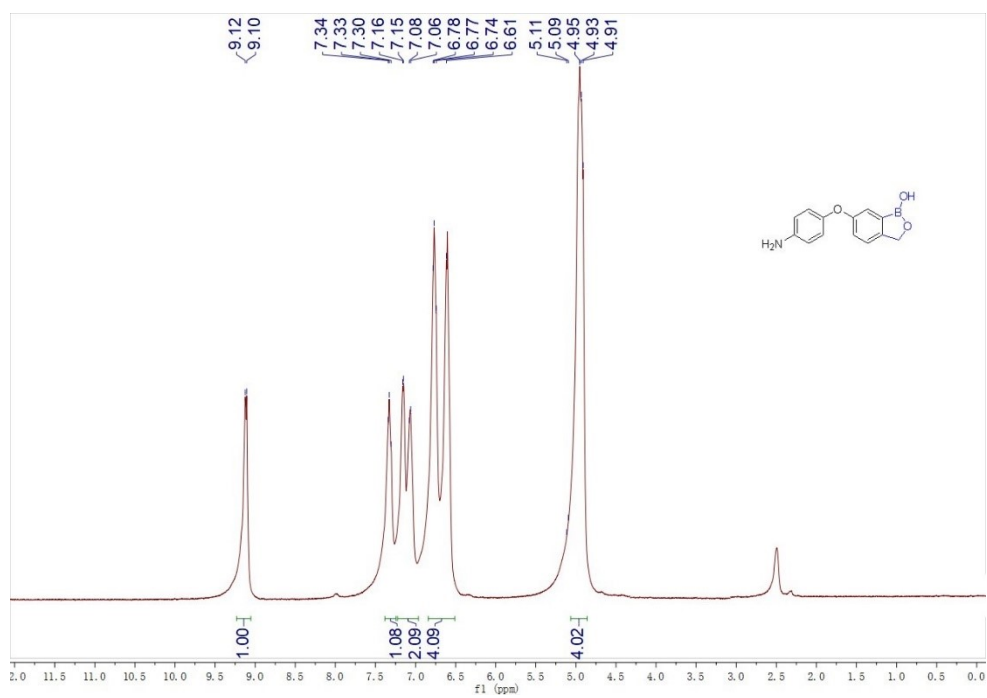

Figure S20.  $^1\text{H}$ -NMR spectrum of 3j

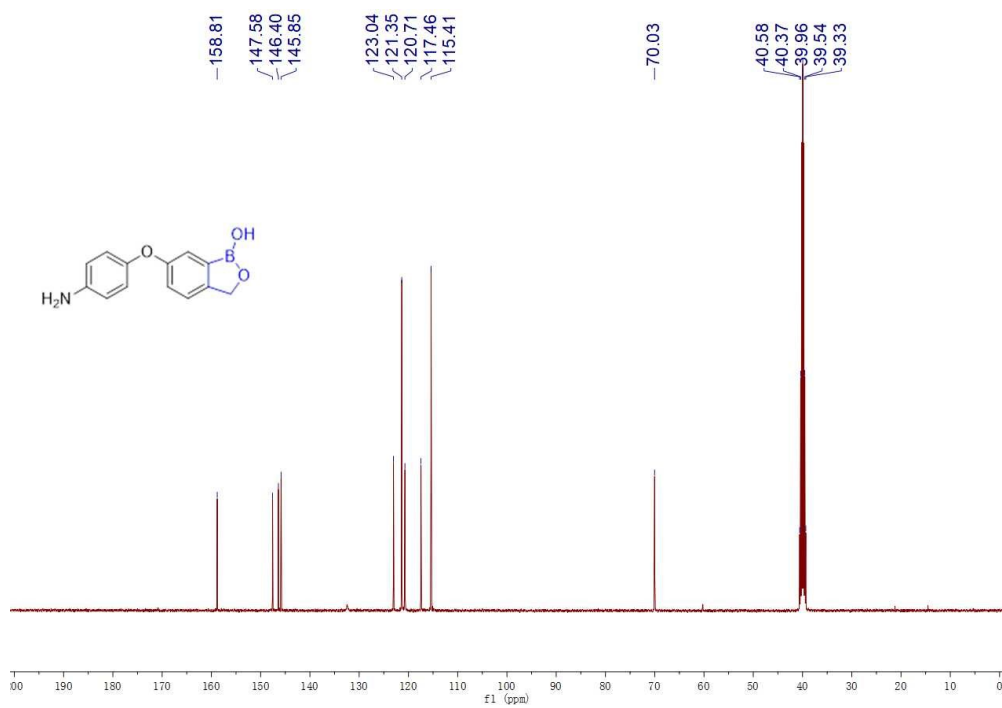

Figure S21.  $^{13}\text{C}$ -NMR spectrum of 3j

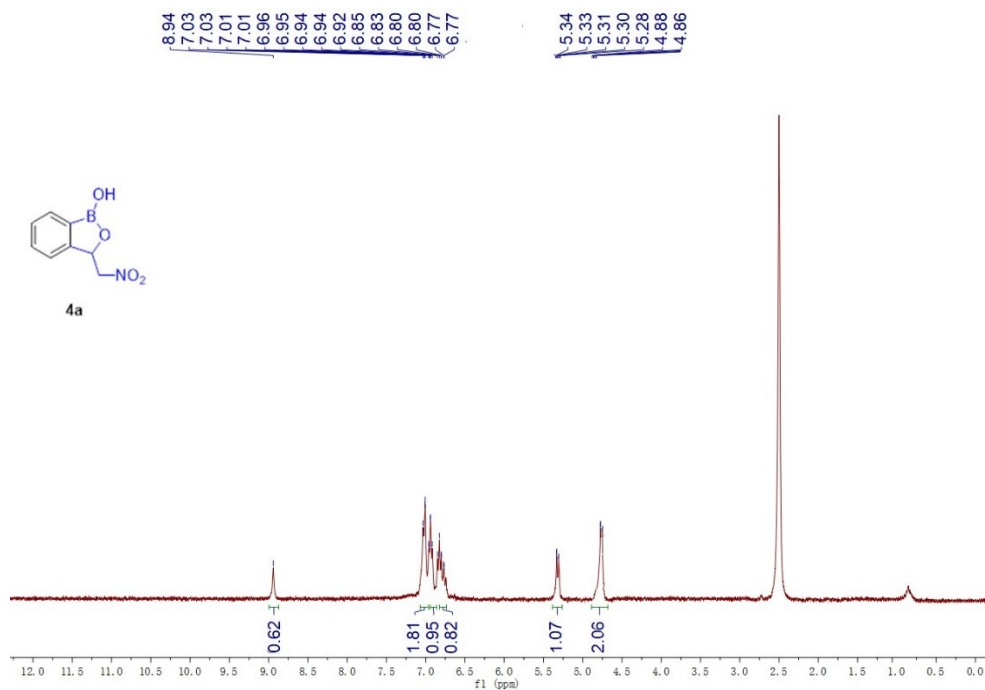

Figure S22. <sup>1</sup>H-NMR spectrum of 4a

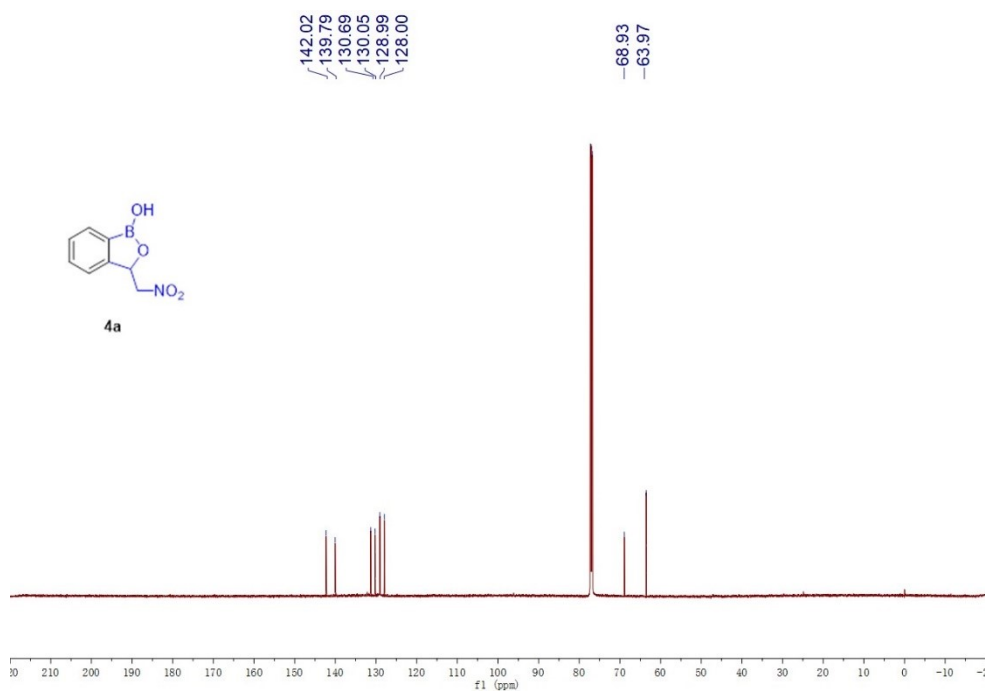

Figure S23. <sup>13</sup>C-NMR spectrum of 4a

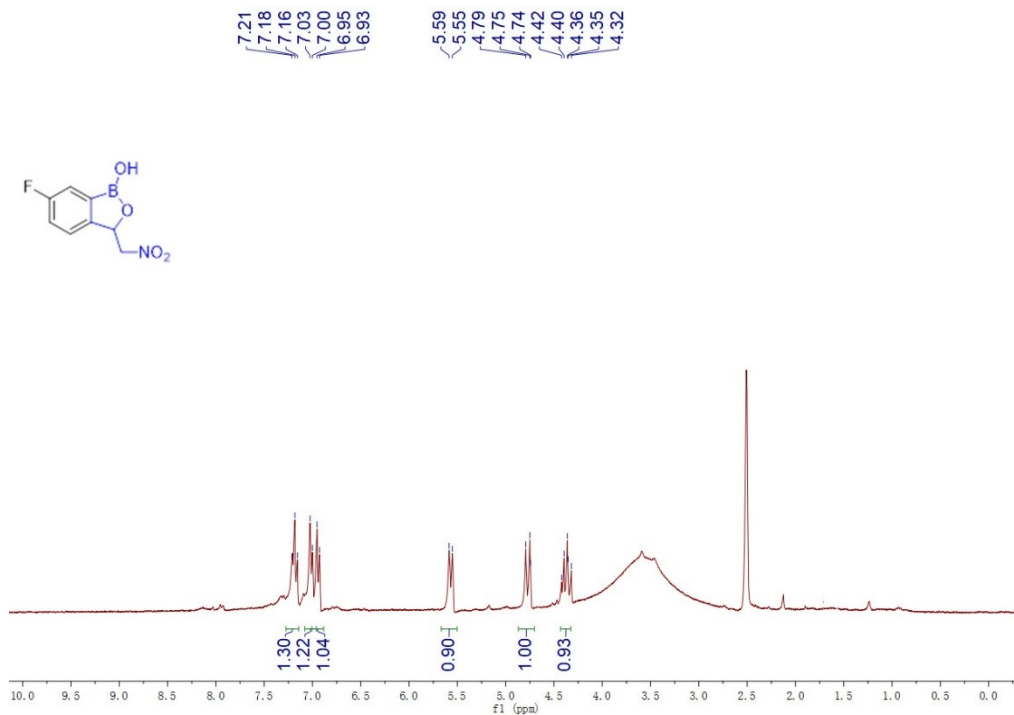

Figure S24. <sup>1</sup>H-NMR spectrum of 4b

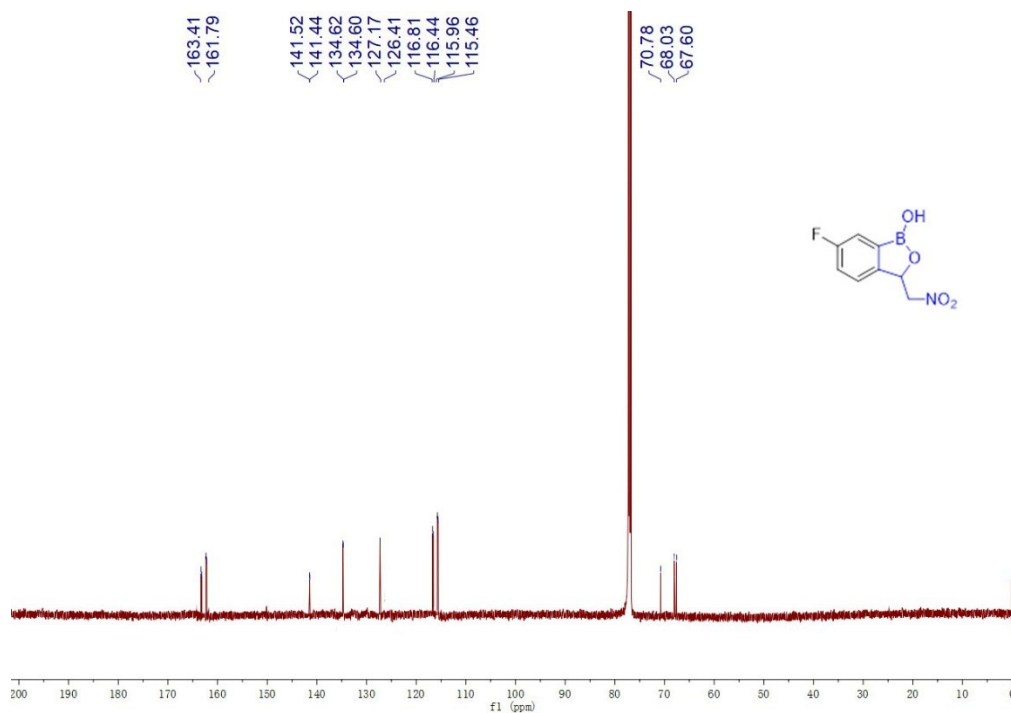

Figure S25. <sup>13</sup>C-NMR spectrum of 4b

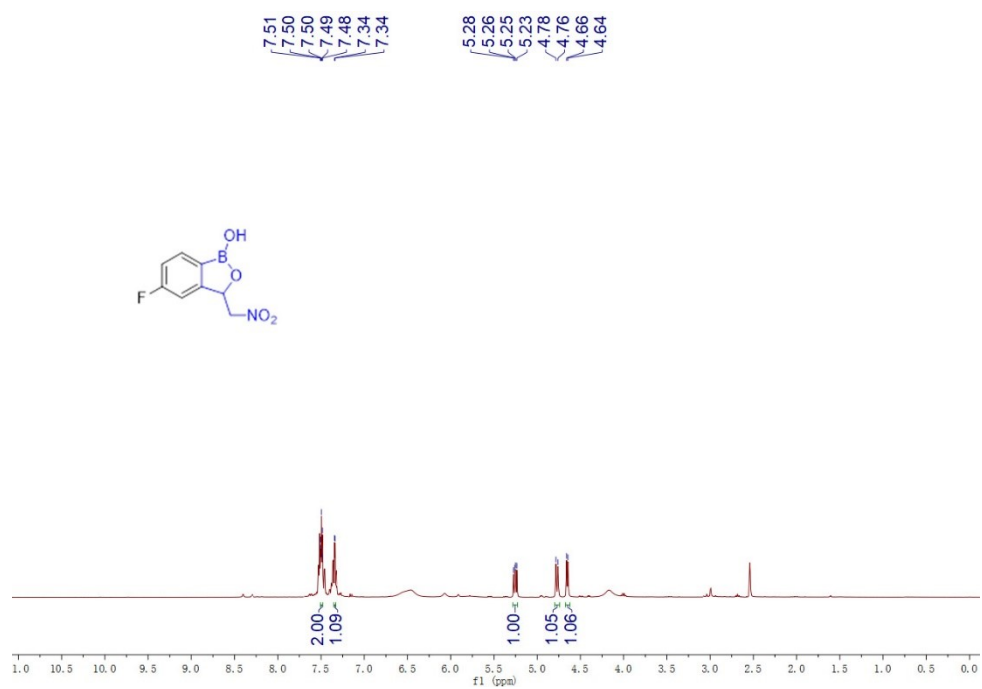

Figure S26. <sup>1</sup>H-NMR spectrum of 4c

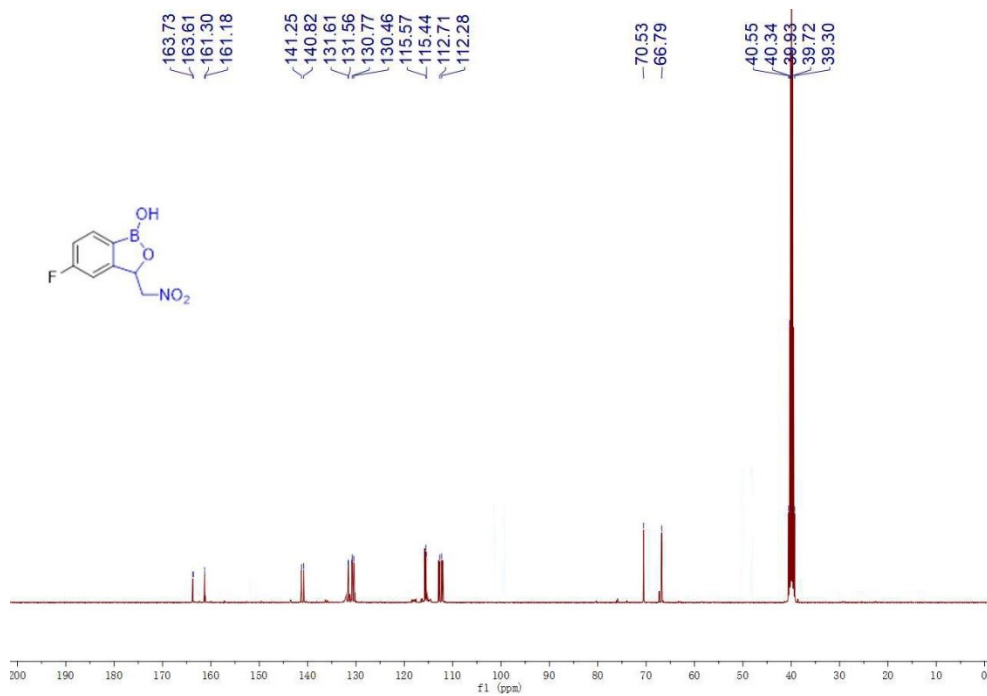

Figure S27. <sup>13</sup>C-NMR spectrum of 4c



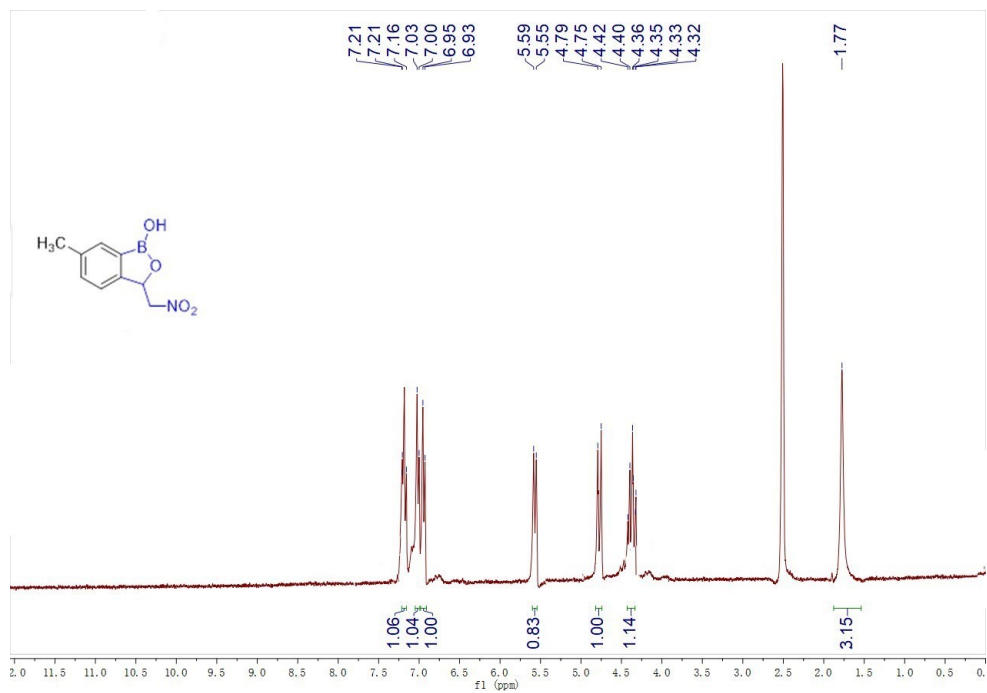

Figure S28. <sup>1</sup>H-NMR spectrum of 4d

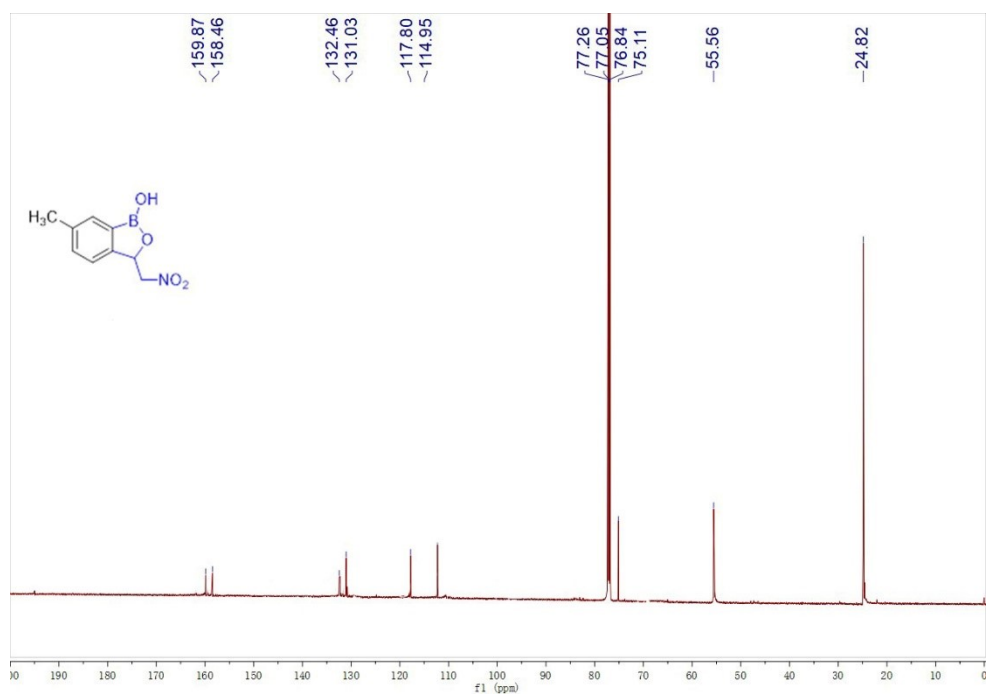

Figure S29. <sup>13</sup>C-NMR spectrum of 4d

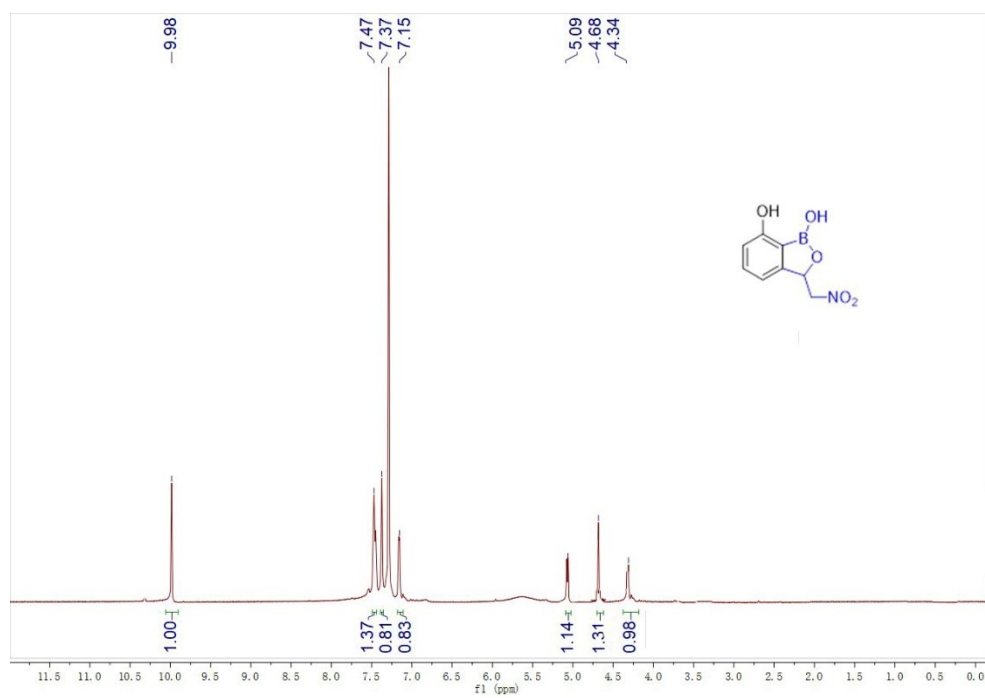

Figure S30.  $^1\text{H}$ -NMR spectrum of 4e

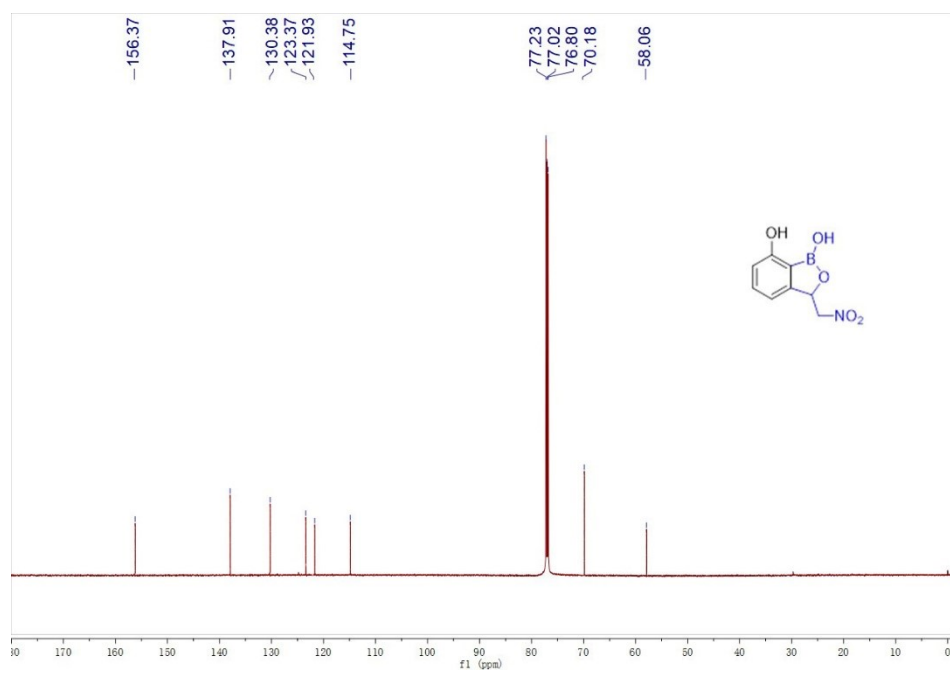

Figure S31.  $^{13}\text{C}$ -NMR spectrum of 4e

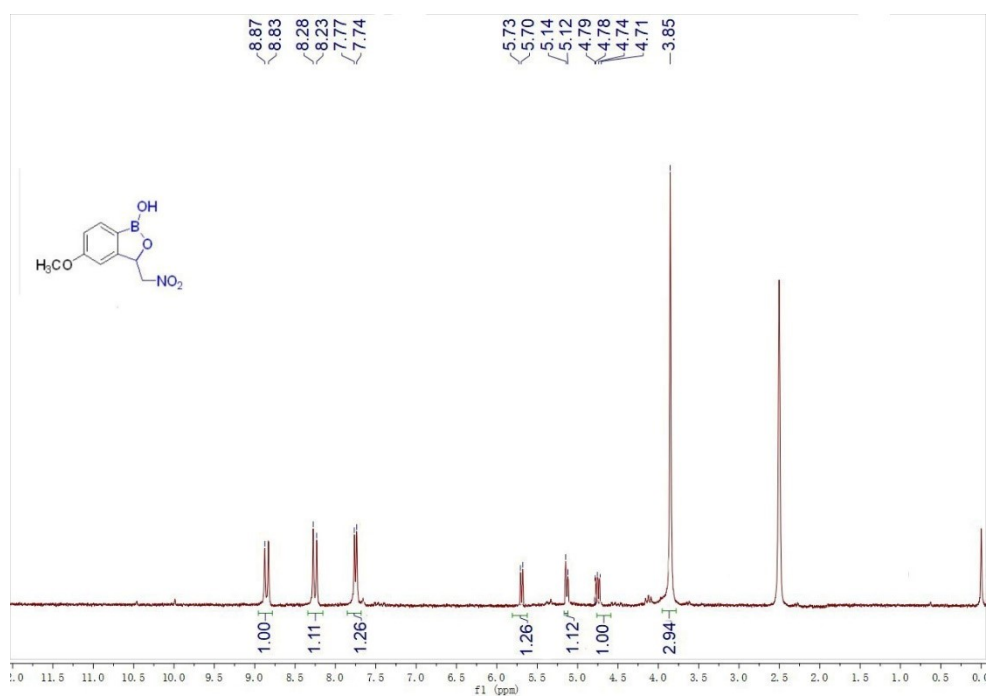

Figure S32.  $^1\text{H}$ -NMR spectrum of 4f

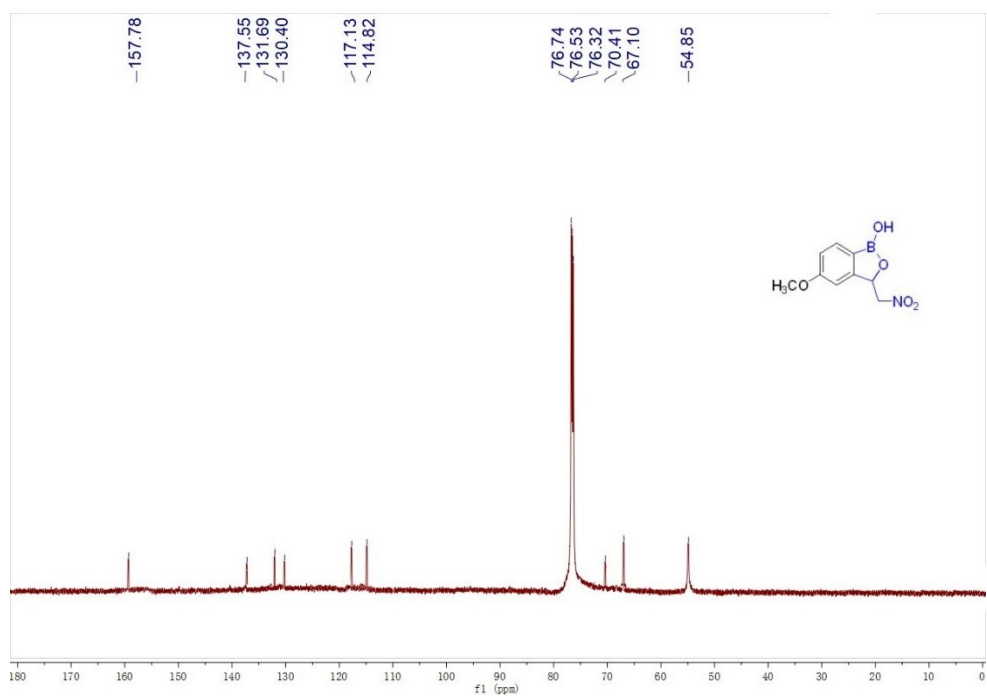

Figure S33.  $^{13}\text{C}$ -NMR spectrum of 4f

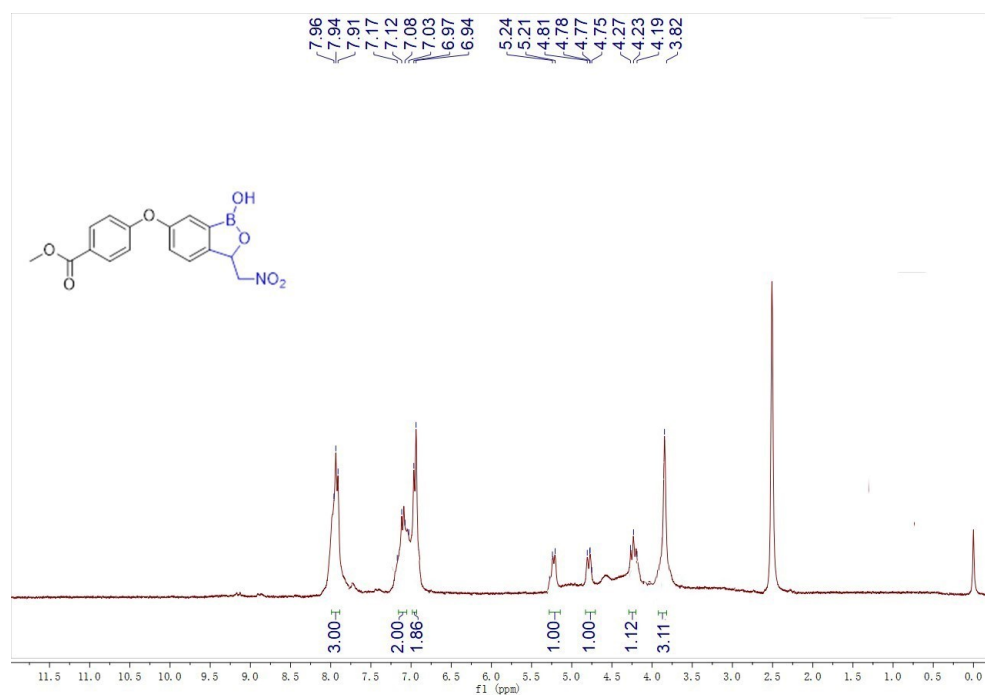

Figure S34. <sup>1</sup>H-NMR spectrum of 4g

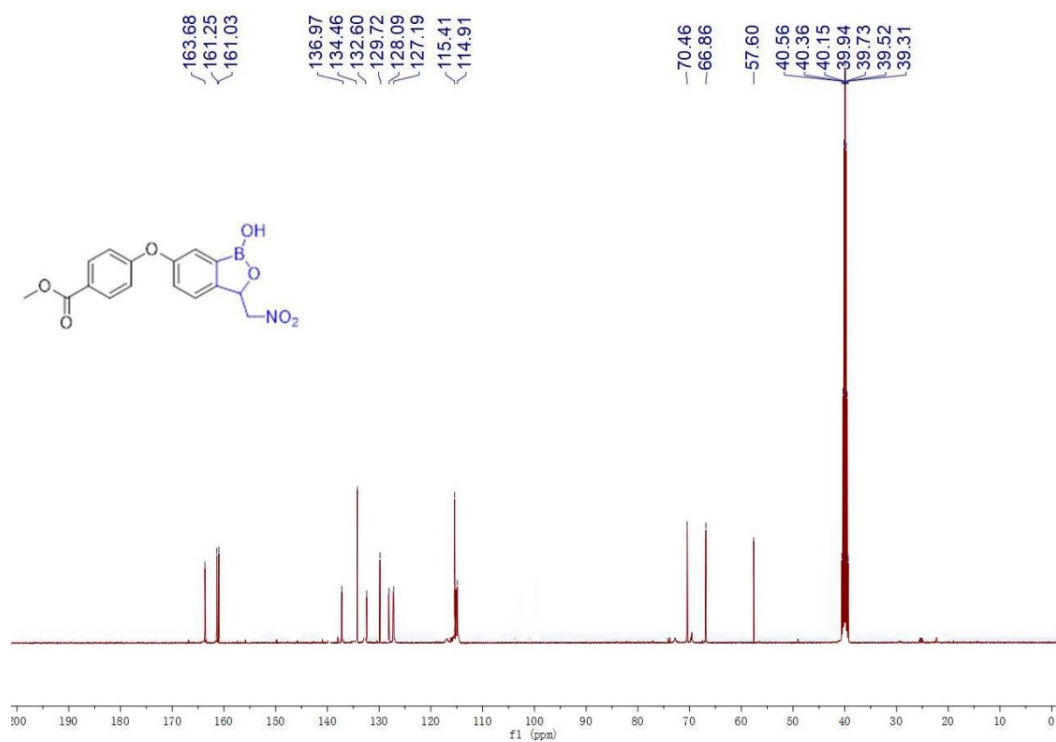

Figure S35. <sup>13</sup>C-NMR spectrum of 4g

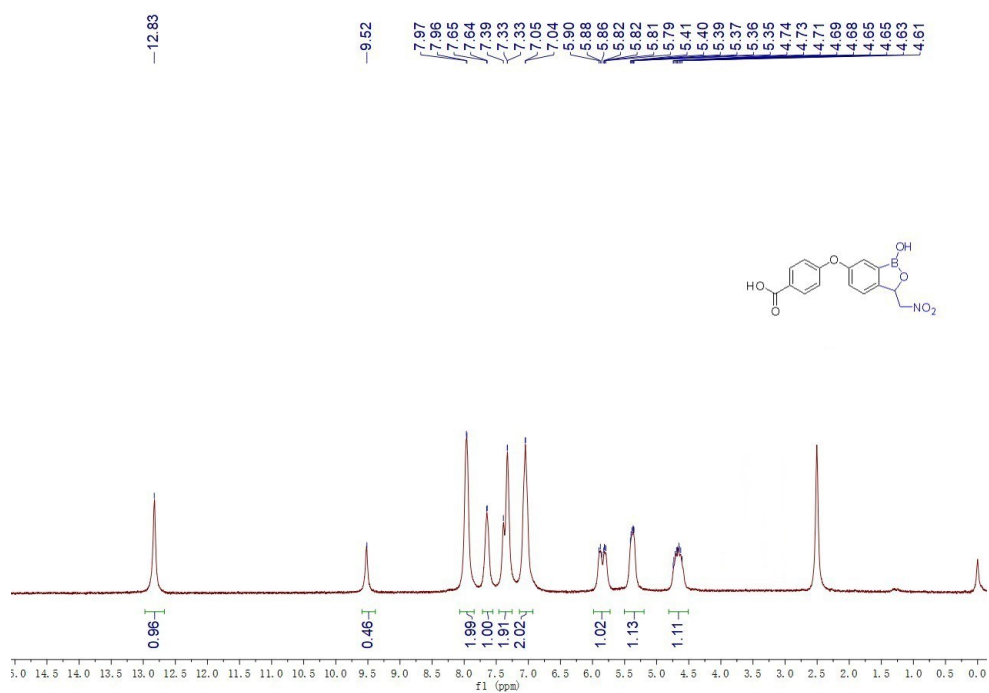

Figure S36. <sup>1</sup>H-NMR spectrum of 4h

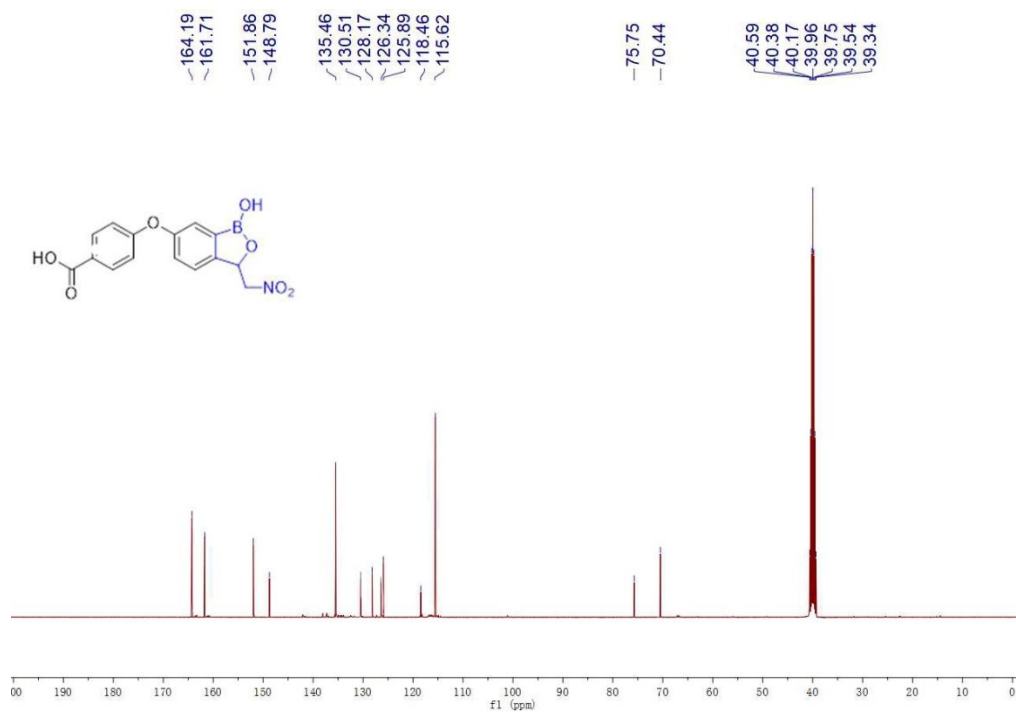

Figure S37. <sup>13</sup>C-NMR spectrum of 4h

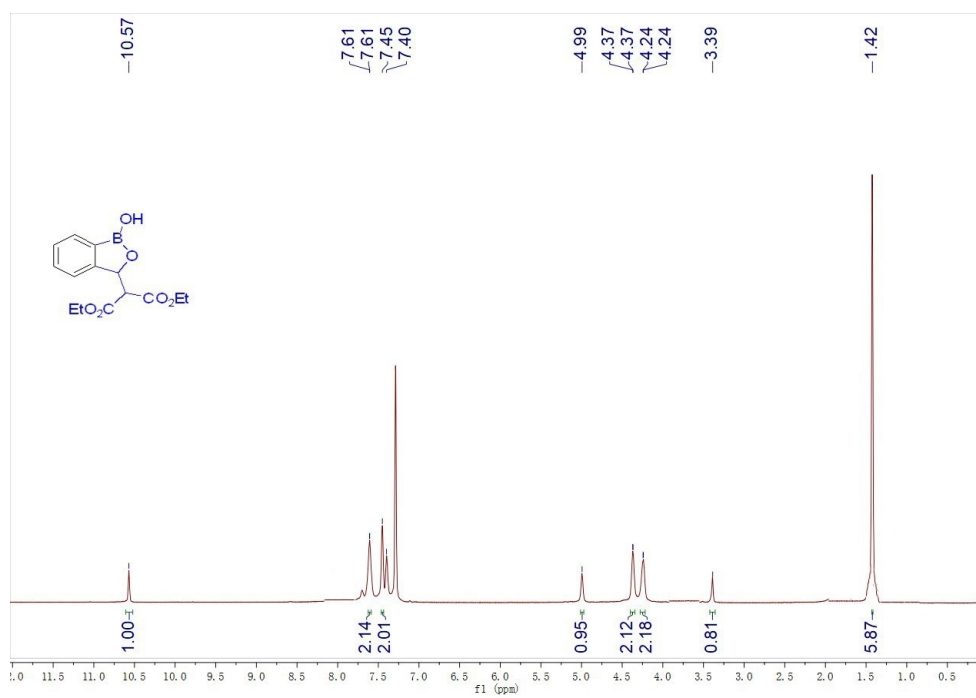

Figure S38.  $^1\text{H}$ -NMR spectrum of 4i

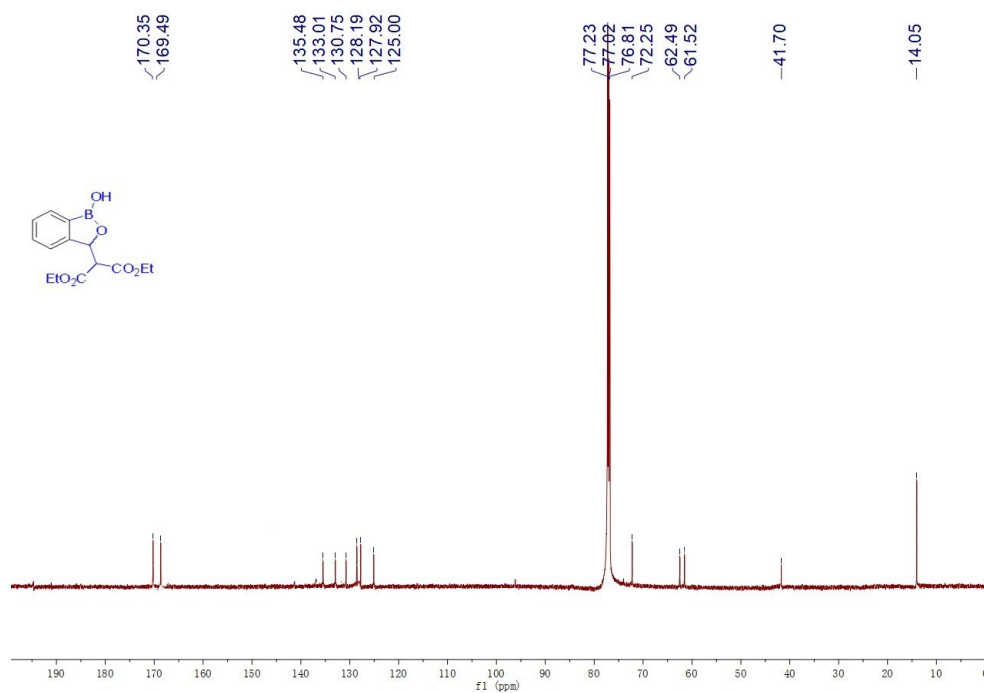

Figure S39.  $^{13}\text{C}$ -NMR spectrum of 4i

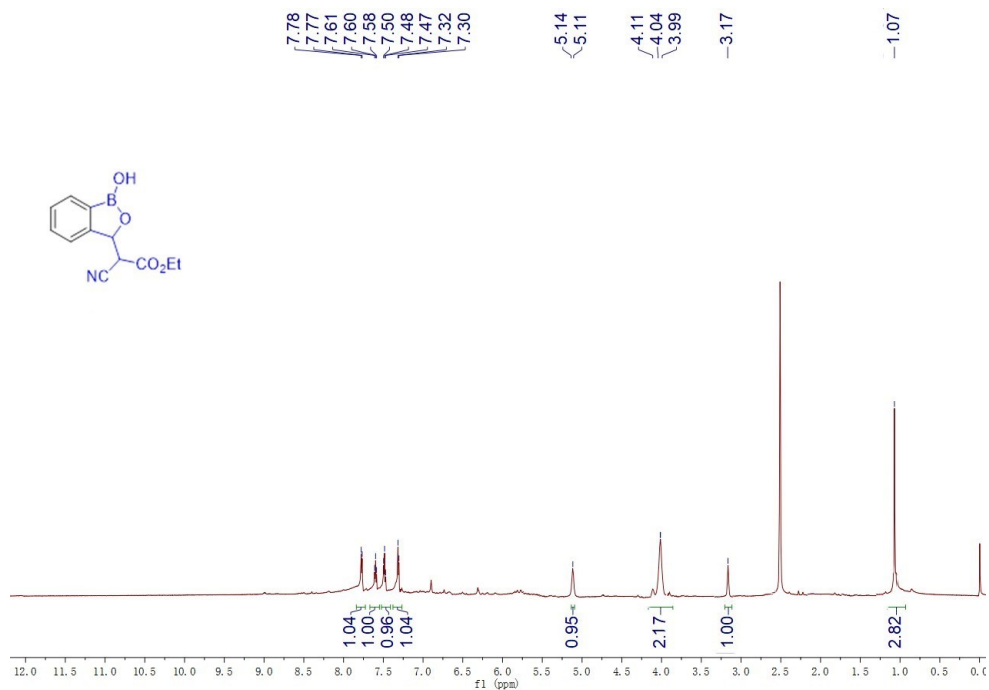

Figure S40. <sup>1</sup>H-NMR spectrum of 4j

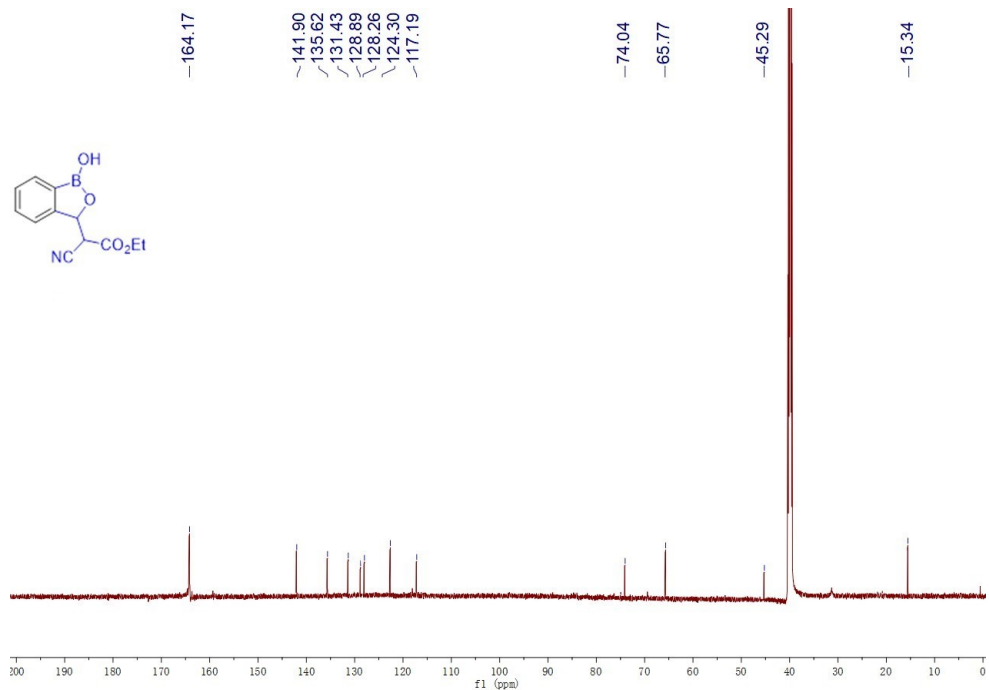

Figure S41. <sup>13</sup>C-NMR spectrum of 4j
